# Supplementary material for: Adaptive Laboratory Evolution of Staphylococcus aureus Resistance to Vancomycin and Daptomycin: Mutation Patterns and Cross-Resistance
Source: MDPI journal article supplement (doi:10.3390/antibiotics12050928), 2023-05-18
Supplement: s1 [file s1]

# Selection steps in media with vancomycin

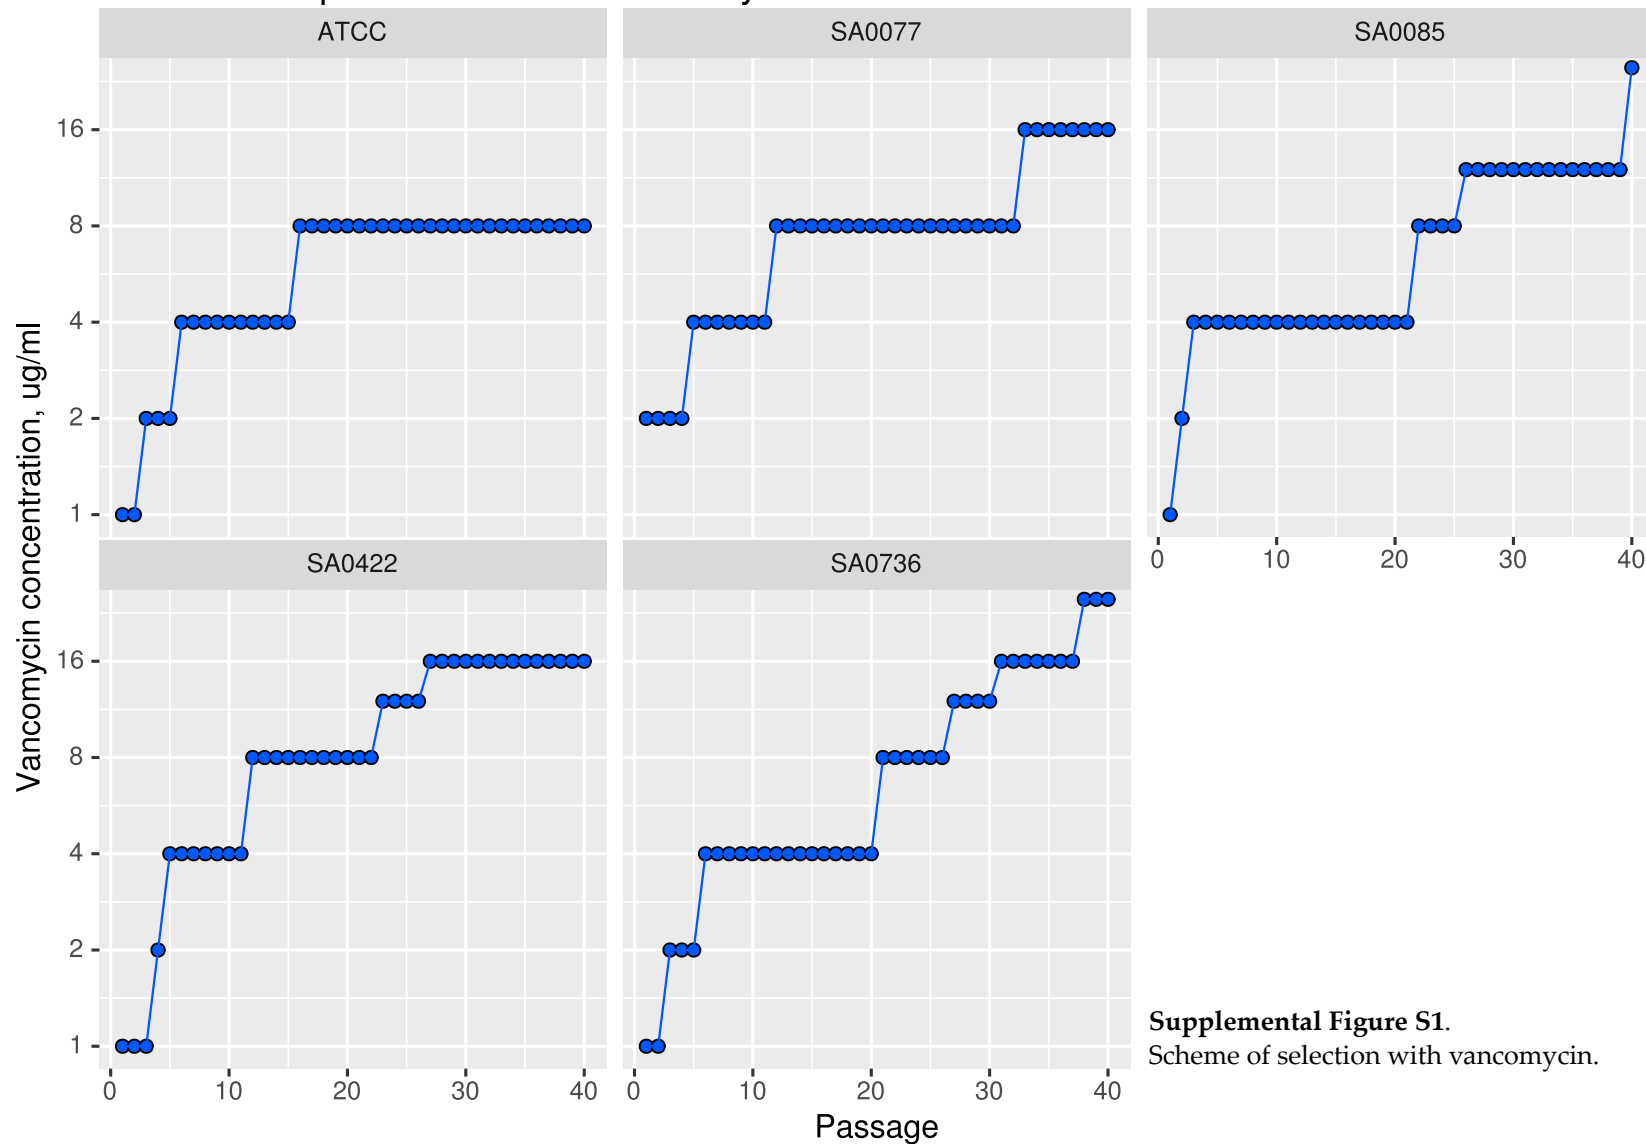

**Supplemental Figure S1.**  
Scheme of selection with vancomycin.

# Selection steps in media with daptomycin

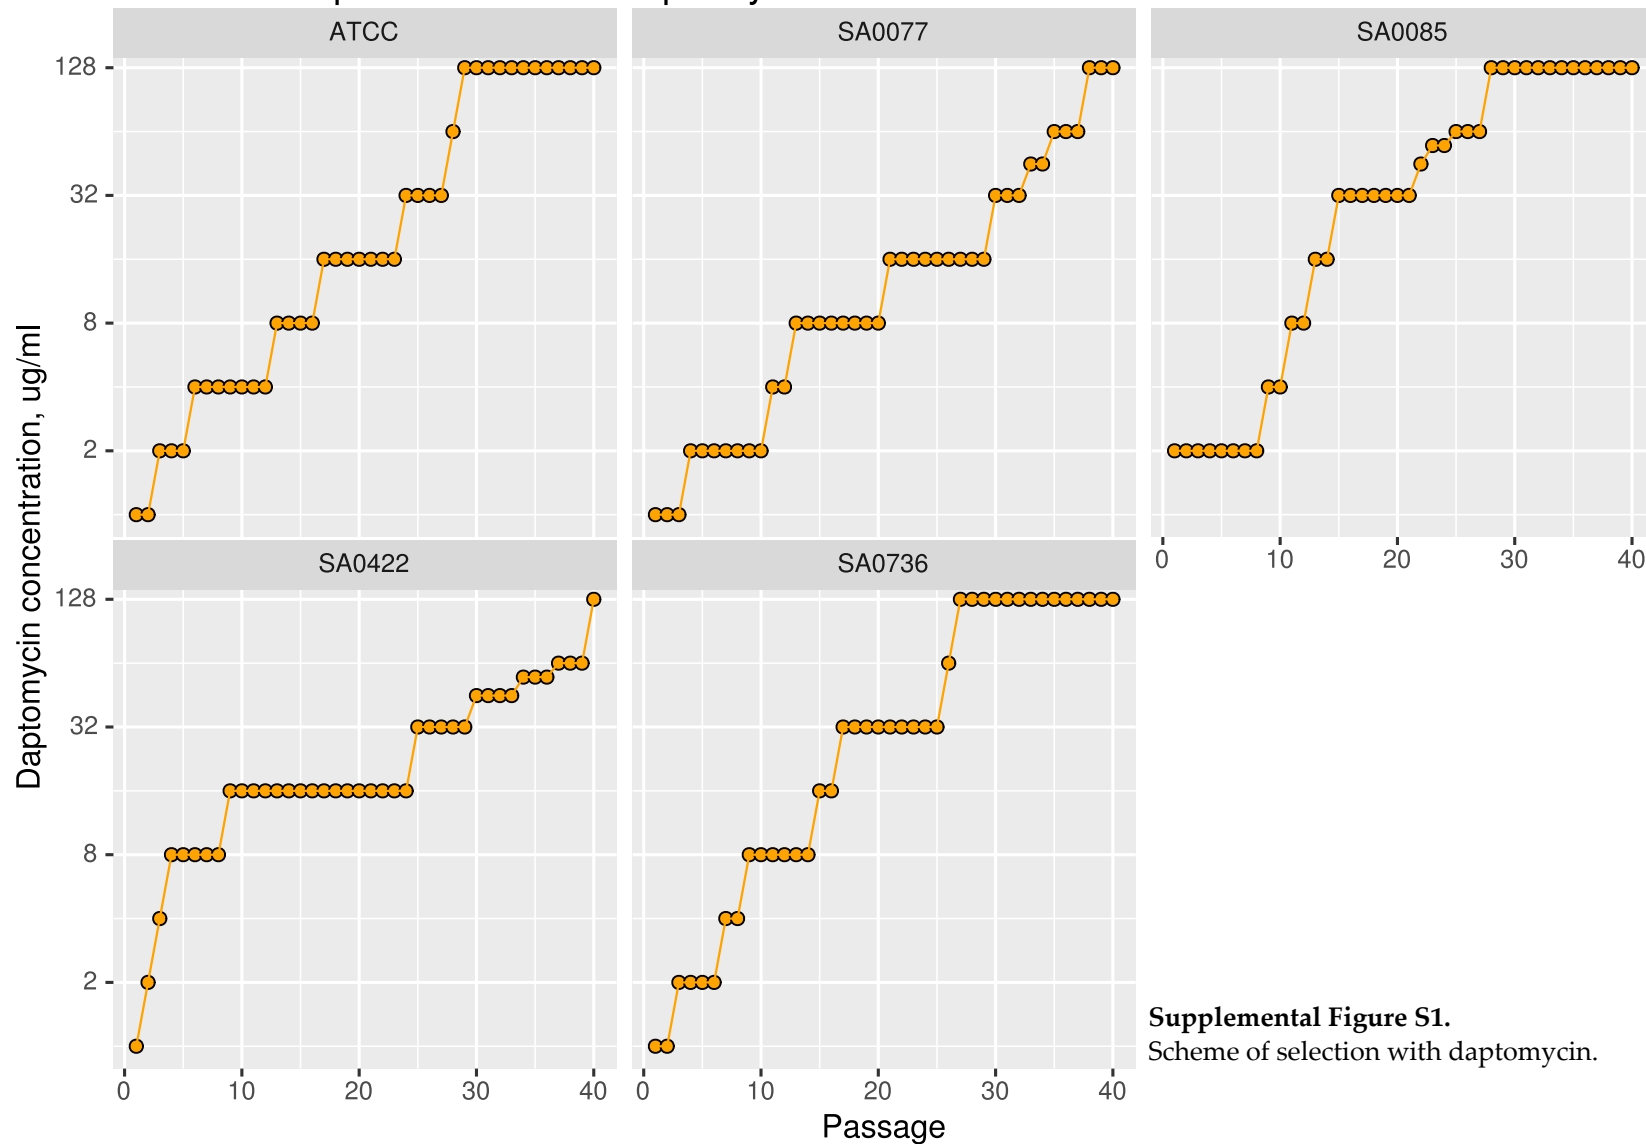

**Supplemental Figure S1.**  
Scheme of selection with daptomycin.
