# Supplementary material for: Adaptive Laboratory Evolution of Staphylococcus aureus Resistance to Vancomycin and Daptomycin: Mutation Patterns and Cross-Resistance
Source: MDPI journal article supplement (doi:10.3390/antibiotics12050928), 2023-05-18
Supplement: s1 [file s1]

# PAP: selection on vancomycin

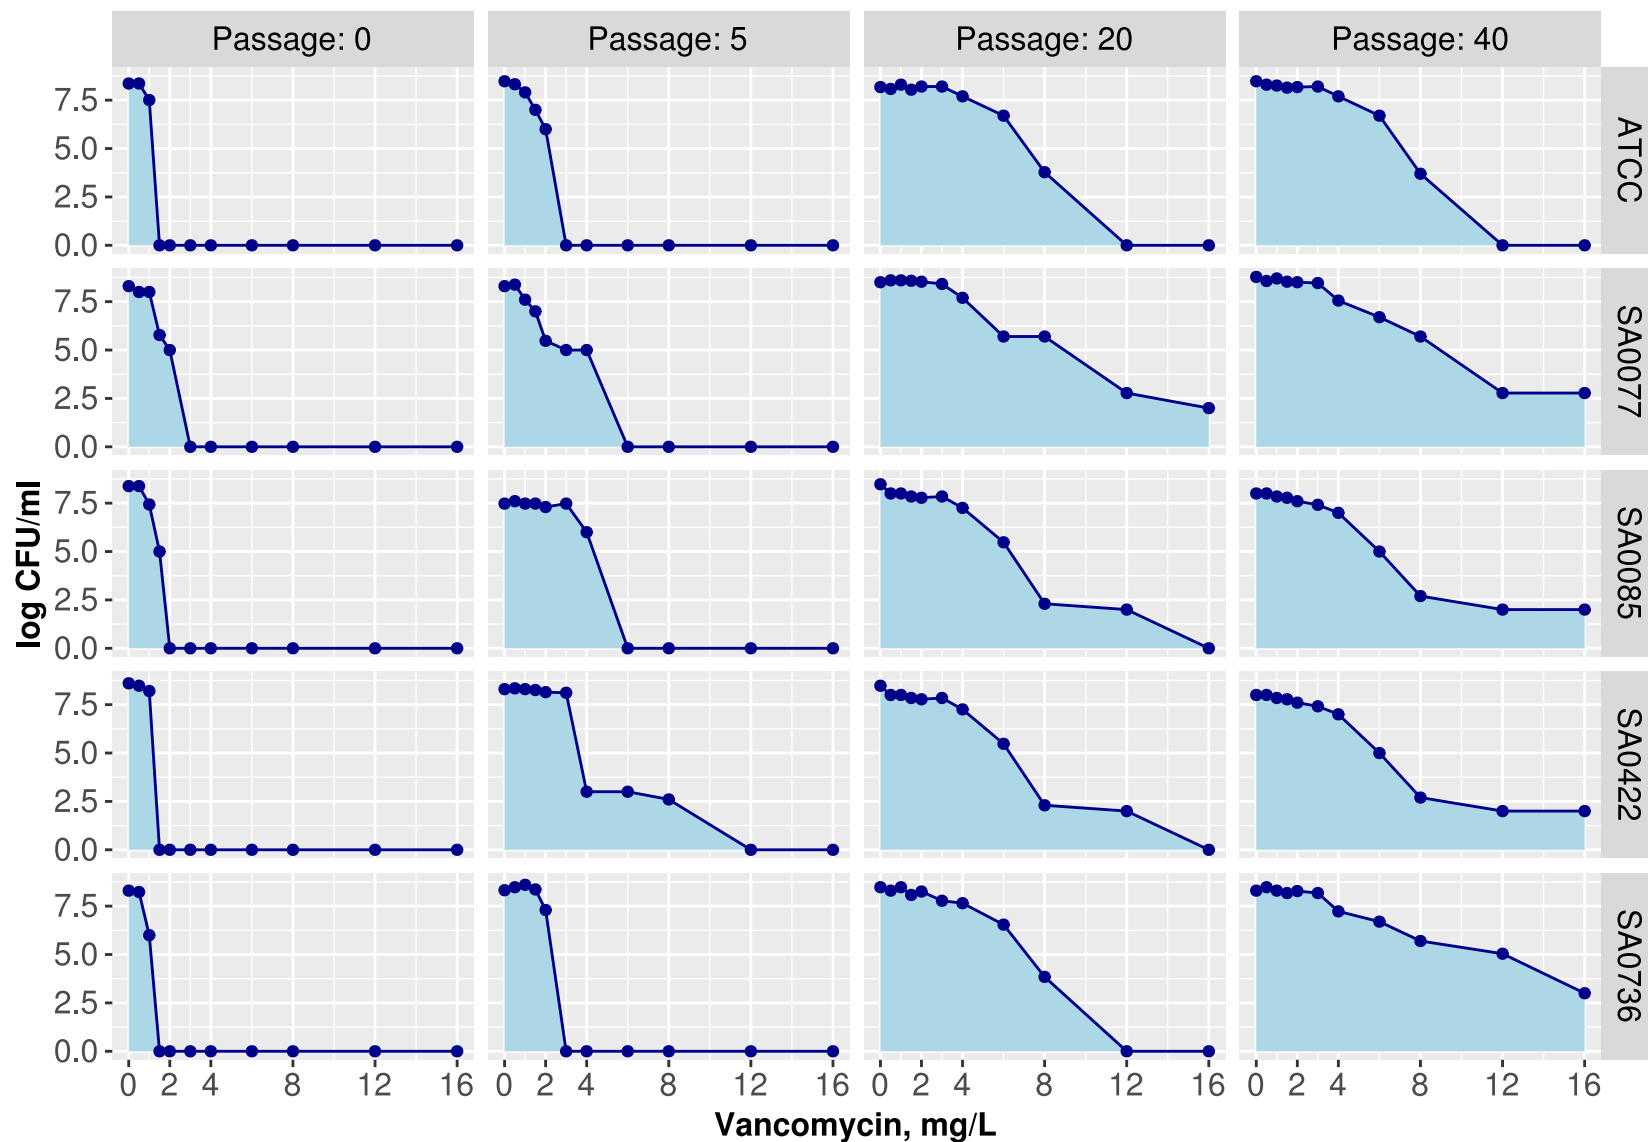

Supplemental Figure S2. Raw plots of PAP analysis with vancomycin during vancomycin resistance selection.

# PAP: selection on daptomycin

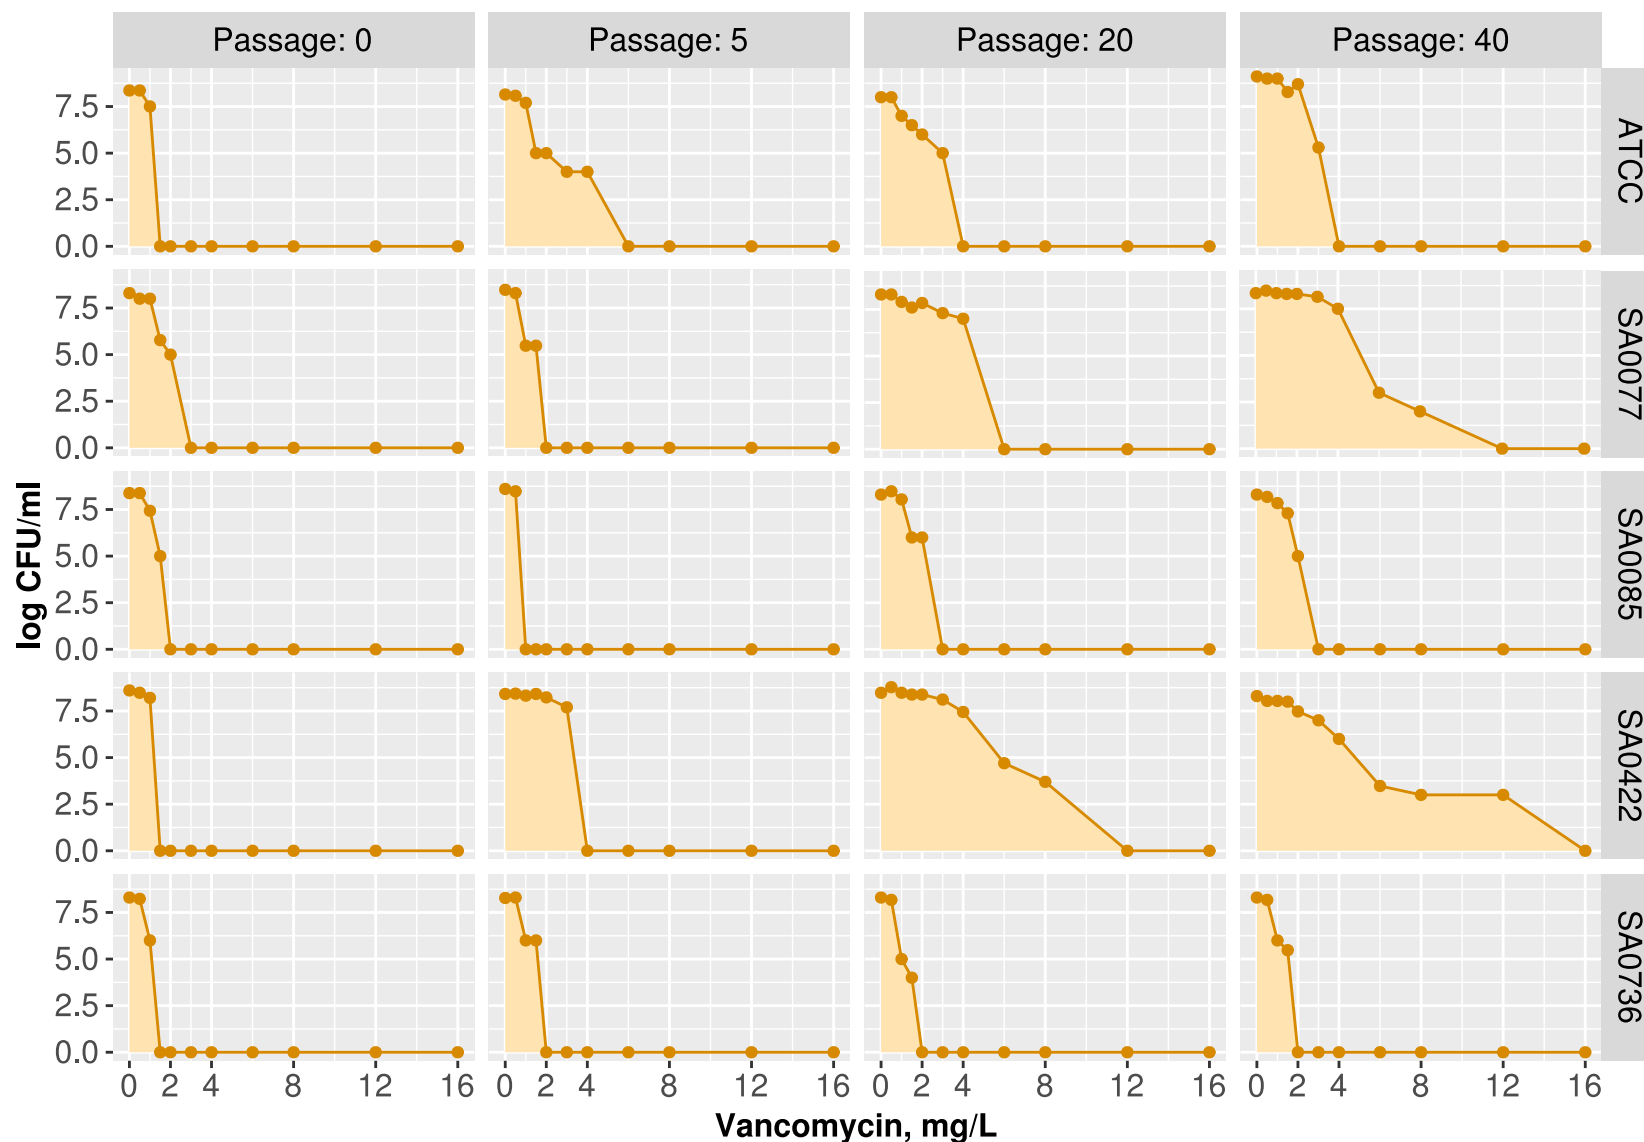

**Supplemental Figure S2.** Raw plots of PAP analysis with vancomycin during daptomycin resistance selection.
