# Supplementary material for: Adaptive Laboratory Evolution of Staphylococcus aureus Resistance to Vancomycin and Daptomycin: Mutation Patterns and Cross-Resistance
Source: MDPI journal article supplement (doi:10.3390/antibiotics12050928), 2023-05-18
Supplement: s1 [file s1]

Supplemental Table S4. Bacterial strains used in the study

| Strain     | Source               | Origin                           | Genotype               | Phenotype | VAN MIC | DAP MIC | Selection on                    |
|------------|----------------------|----------------------------------|------------------------|-----------|---------|---------|---------------------------------|
| SA0077     | Clinical             | 2011, Moscow, HA-MRSA            | ST8-t008-SCCmec IVc    | MRSA      | 1       | 0.25    | VAN, DAP, Ab free, Ab free + Ca |
| SA0085     | Clinical             | 2011, Moscow, HA-MRSA            | ST239-t632-SCCmec IIIA | MRSA      | 1       | 0.5     | VAN, DAP, Ab free, Ab free + Ca |
| SA0422     | Clinical             | 2013, Moscow, HA-MRSA            | ST8-t008-SCCmec IVc    | MRSA      | 1       | 0.25    | VAN, DAP                        |
| SA0736     | Clinical             | 2014, Saint Petersburg, HA-MRSA  | ST8-t008-SCCmec IVc    | MRSA      | 0.5     | 0.25    | VAN, DAP                        |
| ATCC 29213 | Laboratory reference | Culti-Loops™, Thermo Scientific™ | ST5-t002               | MSSA      | 0.25    | 0.125   | VAN, DAP                        |
| RN4220     | Laboratory reference |                                  |                        | MSSA      | 0.5     | 0.25    | Used for genome editing         |

VAN – selection on vancomycin, DAP – selection on daptomycin, Ab free – selection on antibiotic free medium, Ab free + Ca – selection on antibiotic free medium supplemented 50 mg/L of calcium.
