# Supplementary material for: Adaptive Laboratory Evolution of Staphylococcus aureus Resistance to Vancomycin and Daptomycin: Mutation Patterns and Cross-Resistance
Source: MDPI journal article supplement (doi:10.3390/antibiotics12050928), 2023-05-18
Supplement: s1 [file s1]

Supplemental Table S1. MIC values for evolved strains and their progenitors (μg/mL).

| Antibiotics                       | Strains    |      |      |        |      |      |       |        |      |      |       |        |      |      |        |      |       |       |        |       |
|-----------------------------------|------------|------|------|--------|------|------|-------|--------|------|------|-------|--------|------|------|--------|------|-------|-------|--------|-------|
|                                   | ATCC 29213 |      |      | SA0077 |      |      |       | SA0085 |      |      |       | SA0422 |      |      | SA0736 |      |       |       | RN4220 |       |
|                                   | WT         | VAN  | DAP  | WT     | VAN  | DAP  | Abf   | WT     | VAN  | DAP  | Abf   | WT     | VAN  | DAP  | WT     | VAN  | DAP-W | DAP-Y | WT     | Δ     |
| Oxacillin                         | <0.5       | <0.5 | <0.5 | 512    | 32   | 256  | 128   | 256    | 32   | 256  | 1     | 512    | 256  | 2    | 64     | 64   | 64    | 16    | <0.5   | <0.5  |
| Cefoxitin                         | 4          | 4    | 2    | 256    | 128  | 128  | 64    | 256    | 4    | 256  | 4     | 256    | 256  | 64   | 64     | 128  | 64    | 8     | 4      | 4     |
| Ceftaroline                       | .125       | .125 | 0.25 | 1      | 1    | 0.5  | 1     | 1      | .125 | 1    | 0.5   | 2      | 1    | 0.5  | 1      | 0.5  | 0.5   | 0.5   | 0.5    | 0.5   |
| Vancomycin                        | 0.25       | 8    | 4    | 1      | 8    | 4    | 1     | 1      | 8    | 4    | 1     | 1      | 4    | 2    | 0.5    | 8    | 4     | 4     | 0.5    | 0.5   |
| Teicoplanin                       | 0.06       | 8    | 4    | 0.25   | 8    | 0.25 | .125  | .125   | 8    | 8    | .125  | 0.5    | 4    | 1    | 0.25   | 8    | 8     | 8     | 0.25   | 0.25  |
| Daptomycin                        | .125       | 2    | 64   | 0.25   | 2    | 32   | 0.25  | 0.5    | 2    | >64  | 0.5   | 0.25   | 2    | >64  | 0.25   | 2    | >64   | >64   | 0.25   | 0.25  |
| Oritivancin                       | 0.06       | 4    | 2    | <0.03  | 2    | 4    | 0.06  | <0.03  | 1    | 1    | <0.03 | <0.03  | 0.5  | 0.5  | <0.03  | 2    | 4     | 4     | 0.016  | 0.016 |
| Dalbavancin                       | <0.016     | 2    | .125 | 0.03   | 2    | .125 | 0.03  | <0.016 | 0.25 | .125 | 0.03  | 0.03   | 1    | 0.25 | 0.03   | 1    | 0.5   | 0.5   | 0.03   | 0.03  |
| Telavancin                        | <0.03      | 0.5  | 0.25 | 0.125  | 1    | .125 | 0.03  | 0.06   | 0.25 | 0.25 | 0.06  | .125   | 1    | 0.25 | .125   | 0.5  | .125  | .125  | 0.06   | 0.06  |
| Linezolid                         | 2          | 2    | 1    | 1      | 1    | 1    | 1     | 4      | 1    | 4    | 4     | 2      | 2    | 1    | 1      | 2    | 1     | 1     | NT     | NT    |
| Tedizolid                         | 0.25       | 0.25 | 0.25 | 0.25   | .125 | .125 | 0.125 | 0.5    | 0.06 | 0.5  | 0.5   | 0.25   | 0.25 | .125 | .125   | .125 | .125  | 0.125 | NT     | NT    |
| Tigecycline                       | 0.03       | 0.06 | .016 | 0.25   | 0.06 | 0.06 | 0.06  | .125   | .125 | .125 | .125  | .125   | .125 | 0.06 | 0.06   | .125 | 0.06  | 0.06  | NT     | NT    |
| Tetracycline                      | .125       | 0.5  | 0.06 | 0.06   | 0.06 | 0.06 | 0.06  | 32     | .125 | 16   | 32    | 0.06   | .125 | 0.06 | 16     | 16   | 16    | 16    | NT     | NT    |
| Ciprofloxacin                     | 0.25       | 0.25 | 0.25 | 16     | 64   | 16   | 32    | 256    | 32   | 256  | 256   | 128    | 64   | 32   | 128    | 16   | 64    | 32    | NT     | NT    |
| Moxifloxacin                      | .125       | .125 | .125 | 2      | 4    | 2    | 2     | 8      | 8    | 8    | 8     | 2      | 2    | 2    | 2      | 4    | 4     | 2     | NT     | NT    |
| Rifampicin                        | .004       | .004 | .004 | .004   | .004 | .004 | .004  | >4     | >4   | >4   | >4    | .004   | .004 | .004 | .004   | .016 | .004  | .004  | NT     | NT    |
| Gentamicin                        | 1          | 1    | 0.25 | >128   | >128 | >128 | >128  | >128   | >128 | >128 | >128  | >128   | >128 | >128 | >128   | >128 | >128  | >128  | NT     | NT    |
| Mupirocin                         | 1          | 1    | 1    | 0.5    | 1    | 0.5  | 1     | 1      | 1    | 1    | 1     | 1      | 1    | 1    | 1      | 1    | 0.5   | 1     | NT     | NT    |
| Fusidic acid                      | 0.25       | 0.25 | .125 | 0.06   | 0.06 | 0.06 | 0.06  | .125   | .125 | .125 | .125  | .125   | 0.06 | 0.06 | 0.06   | .125 | 0.06  | 0.06  | NT     | NT    |
| Erythromycin                      | 0.25       | 0.5  | .125 | >128   | >128 | >128 | >128  | >128   | >128 | >128 | >128  | .125   | 0.5  | .125 | .125   | 0.5  | .125  | .125  | NT     | NT    |
| Clindamycin                       | 0.06       | 0.06 | 0.06 | >64    | >64  | >64  | >64   | >64    | >64  | >64  | >64   | 0.06   | 0.06 | 0.06 | 0.06   | 0.06 | 0.06  | 0.06  | NT     | NT    |
| Trimethoprim/<br>sulfamethoxazole | .125       | .125 | 0.06 | 0.03   | 0.06 | 0.06 | .125  | 0.25   | 0.5  | 0.25 | 0.25  | 0.06   | .125 | .125 | 0.06   | .125 | .125  | .125  | NT     | NT    |

**Notes:** WT: MICs of parental strains; VAN/DAP: MICs of derivative strains after 40 passages on vancomycin or daptomycin; Abf: passages on antibiotic-free media; RN4220—strain with deletion in SACOL1927; highlighting MICs—differences between WT and derivatives in MICs by more than one dilution; NT—not tested.
