# Supplementary material for: Adaptive Laboratory Evolution of Staphylococcus aureus Resistance to Vancomycin and Daptomycin: Mutation Patterns and Cross-Resistance
Source: MDPI journal article supplement (doi:10.3390/antibiotics12050928), 2023-05-18
Supplement: s1 [file s1]

Supplemental Table S5. Oligos used for genome editing of *S. aureus* RN4220

| Oligonucleotide name     | Oligonucleotide sequence                                                                          | Notes                                                                                                                                             |
|--------------------------|---------------------------------------------------------------------------------------------------|---------------------------------------------------------------------------------------------------------------------------------------------------|
| Gibson_for_<br>SACOL1927 | PO <sub>4</sub> -agctcCCAGCAATGGCTTCTACGTTG                                                       | targets PAM internal<br>to SACOL1927<br>deletion                                                                                                  |
| Gibson_rev_<br>SACOL1927 | PO <sub>4</sub> -aaaacAACGTAGAAGCCATTGCTGGG                                                       | targets PAM internal<br>to SACOL1927<br>deletion                                                                                                  |
| 90bp_sav_del             | A*T*A*T*TATGAAATGAGTGAAGTATG<br>GACTGCAACACATATCTTCGCATCATAGA<br>GGTATCACGCATTCCATCCCTTTCACAATACT | 90bp probe with 4 5'<br>phosphothiorate<br>bonds to introduce<br>146 bp deletion in<br>SACOL1927 gene,<br>asterisks -<br>phosphothiorate<br>bonds |
| sav_for                  | GGATTGGTCGTTTGTTCGC                                                                               | Oligo for PCR<br>SACOL1927 gene<br>fragment                                                                                                       |
| sav_rev                  | TGAAATGGGTTGGTTCAC                                                                                | Oligo for PCR<br>SACOL1927 gene<br>fragment                                                                                                       |
