# Supplementary material for: Adaptive Laboratory Evolution of Staphylococcus aureus Resistance to Vancomycin and Daptomycin: Mutation Patterns and Cross-Resistance
Source: MDPI journal article supplement (doi:10.3390/antibiotics12050928), 2023-05-18
Supplement: s1 [file s1]

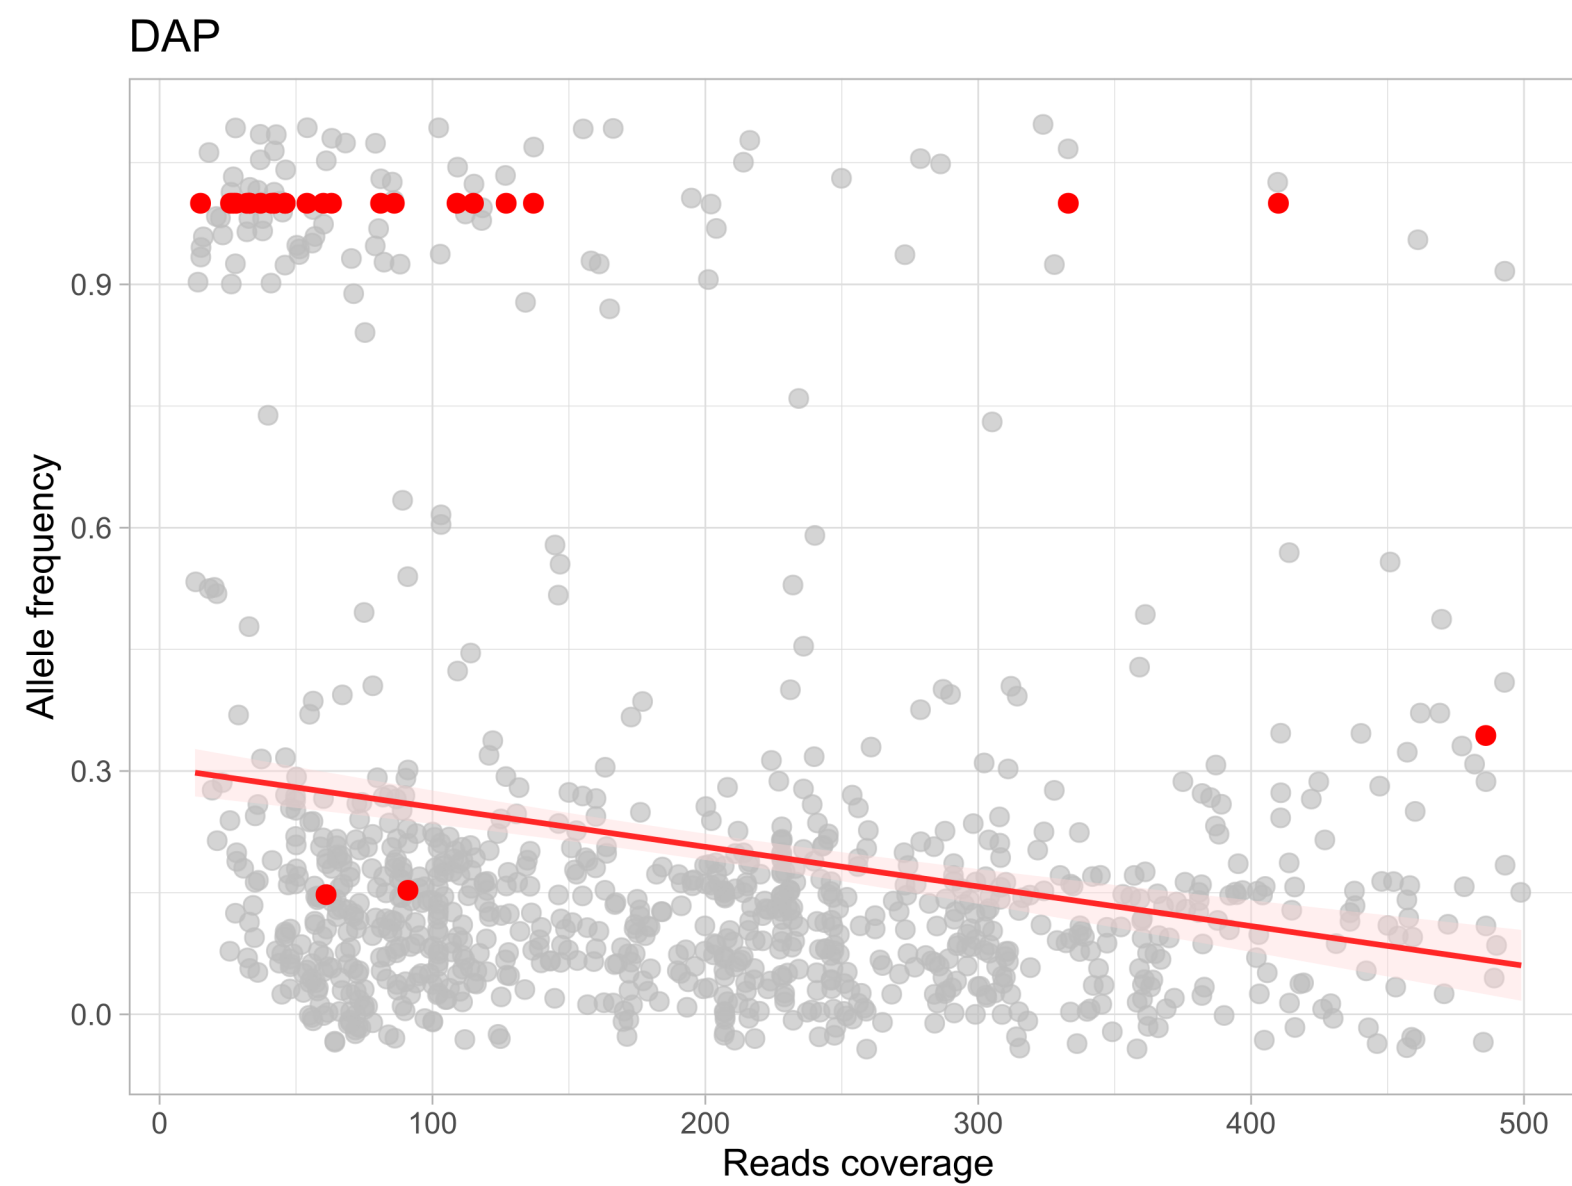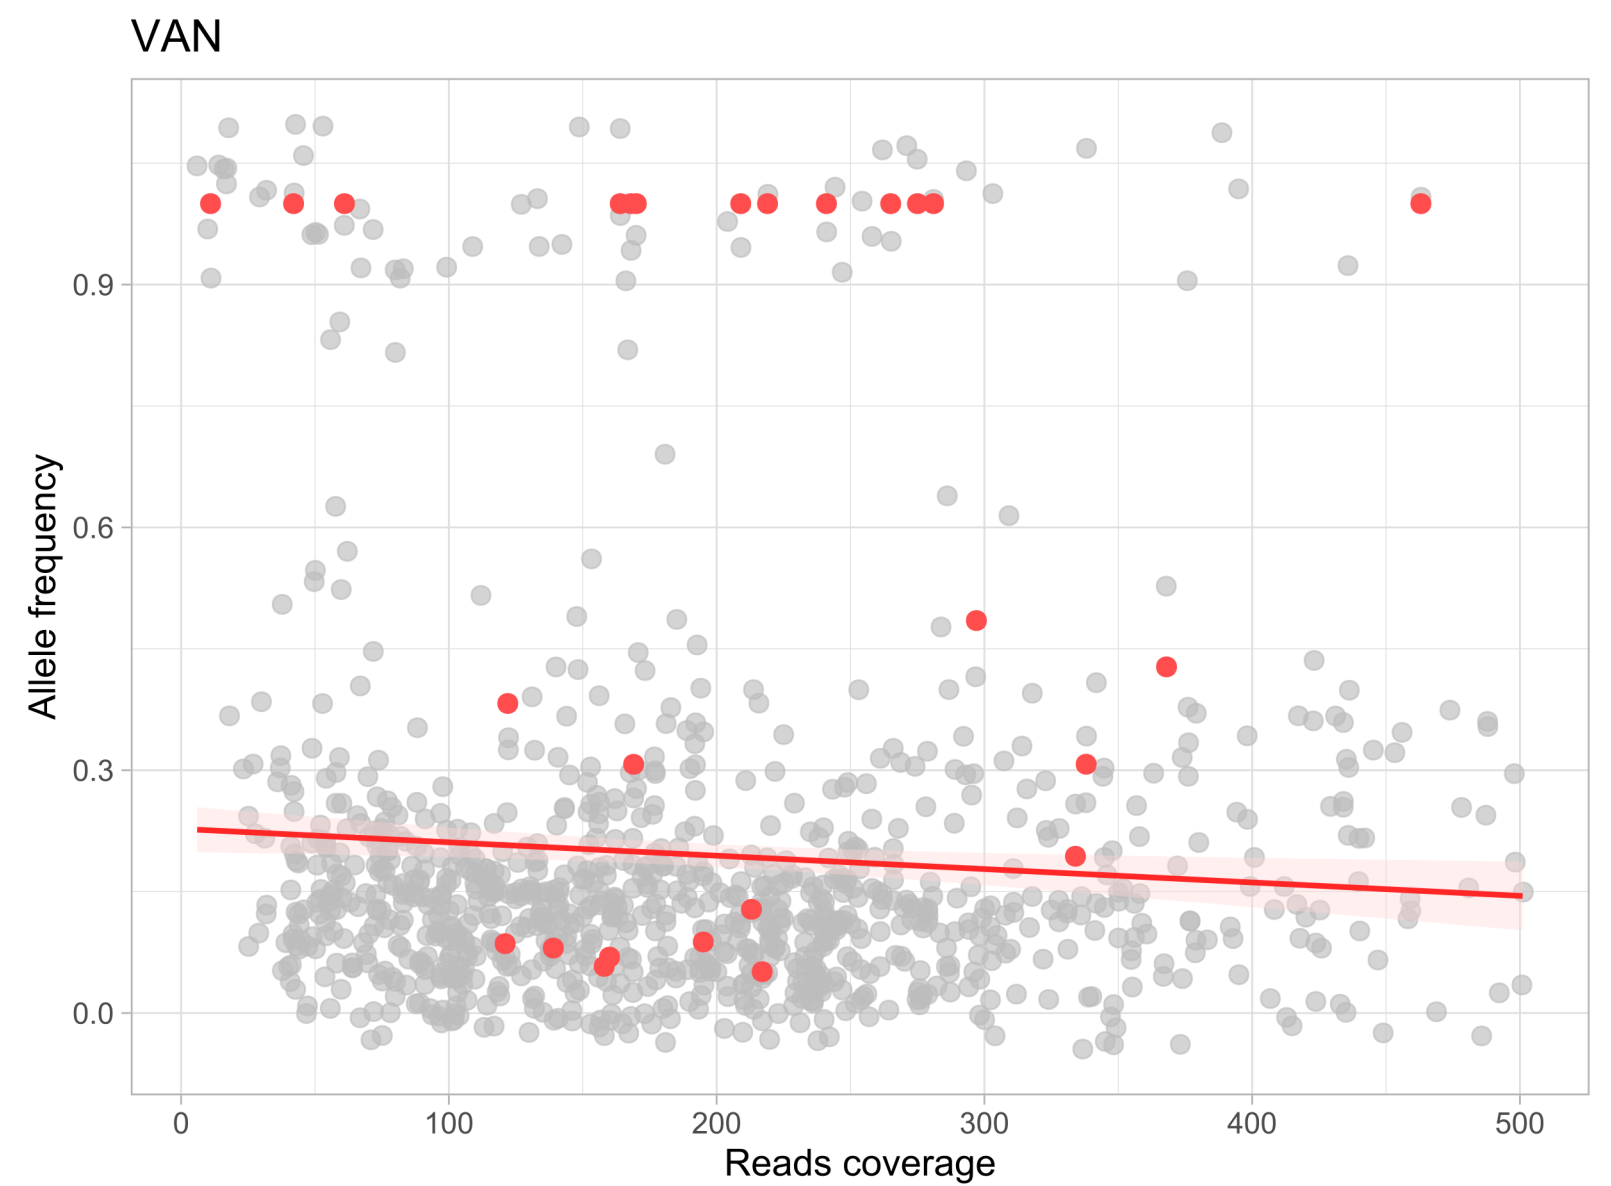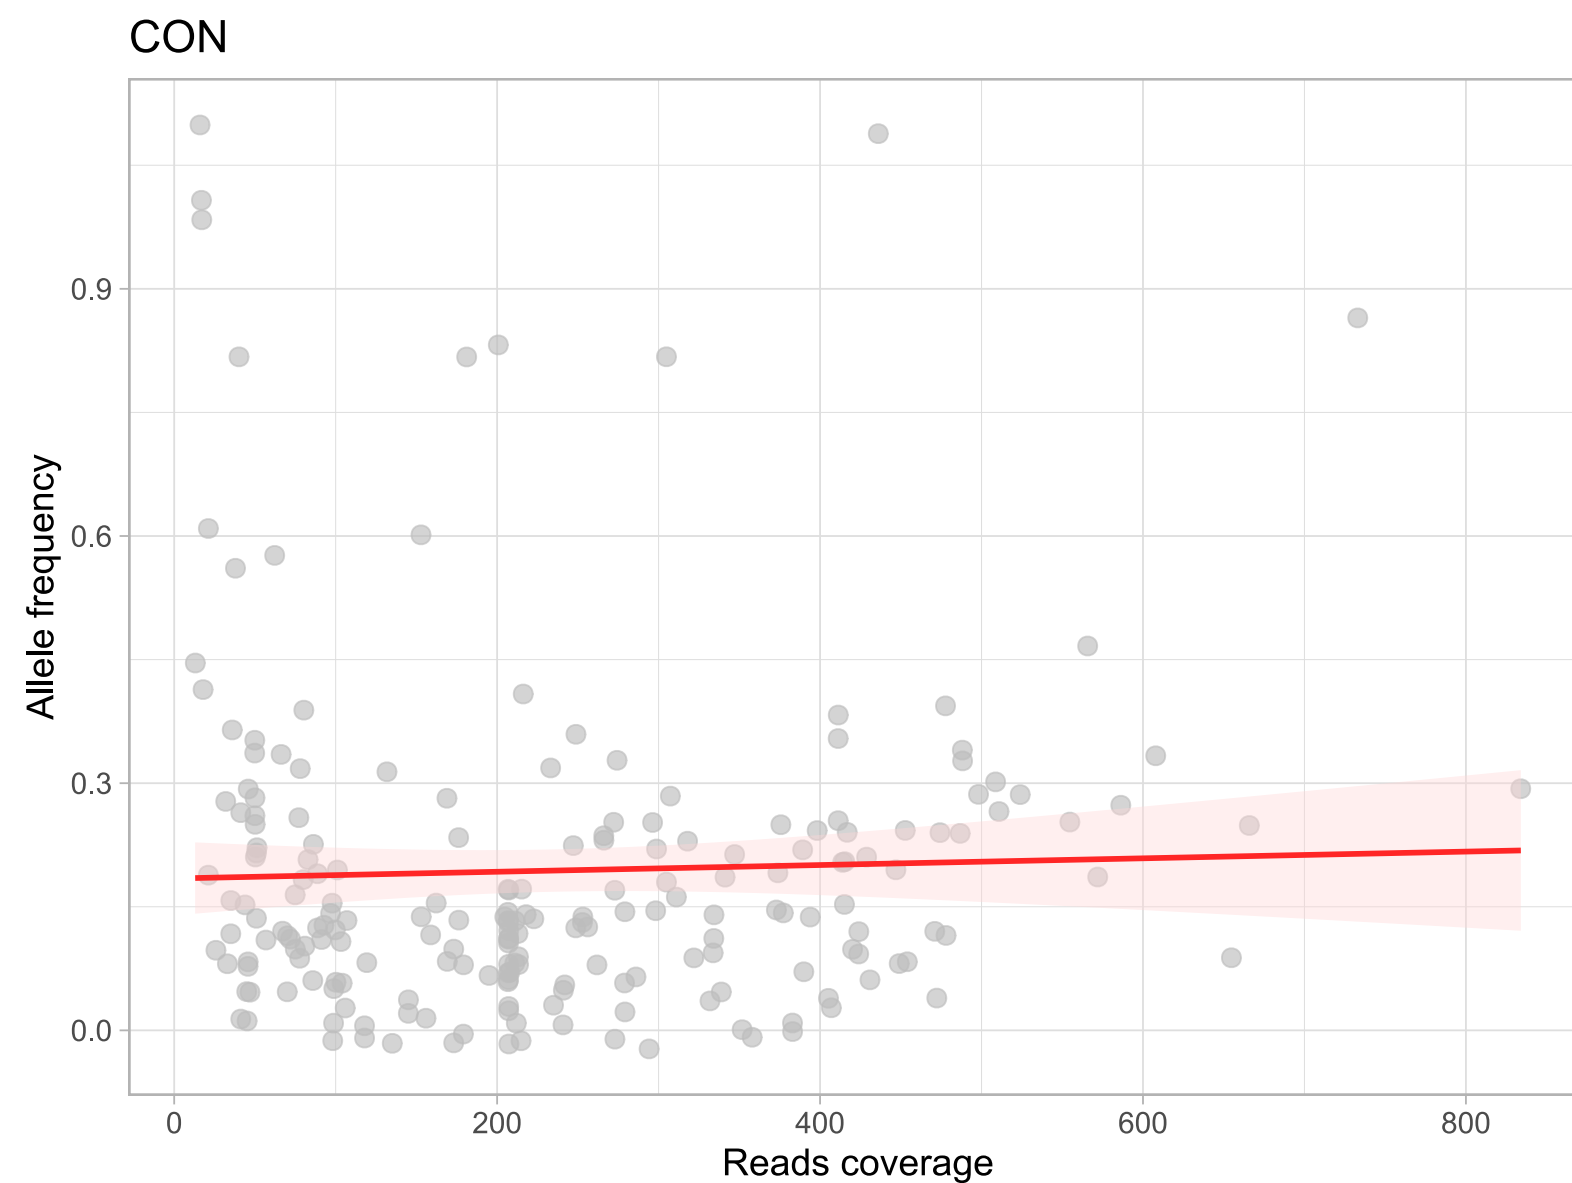

**Supplemental Figure S3.** Correlation analysis of read allele frequency and genome coverage. Overall sequence data from all derivative strains obtained during vancomycin (VAN), daptomycin (DAP) resistance selection, or antibiotic-free passaging (CON) from all collection time points are presented. Linear estimation (red line) was used. Red points are matched to key SNPs involved in vancomycin or daptomycin resistance.
