# Supplementary material for: Adaptive Laboratory Evolution of Staphylococcus aureus Resistance to Vancomycin and Daptomycin: Mutation Patterns and Cross-Resistance
Source: MDPI journal article supplement (doi:10.3390/antibiotics12050928), 2023-05-18
Supplement: s1 [file s1]

**Supplemental Table S2.** Kinetic growth parameters of parental and isogenic derivatives.

| Isolate | Selection      | Dt, min* |                 | r, min <sup>-1</sup> |               | Lag, min |
|---------|----------------|----------|-----------------|----------------------|---------------|----------|
|         |                | M        | Q1-Q3           | M                    | Q1-Q3         | Mean     |
| SA0077  | WT             | 26,086   | 24,495 - 32,968 | 0,027                | 0,021 - 0,028 | 148,82   |
|         | VAN            | 40,073*  | 37,227 - 43,888 | 0,017*               | 0,016 - 0,019 | 168,66*  |
|         | DAP            | 66,124*  | 59,558 - 67,196 | 0,010*               | 0,010 - 0,012 | 228,19*  |
|         | AB free        | 25,034   | 24,321 - 31,784 | 0,027                | 0,021 - 0,028 | 148,82   |
|         | AB free<br>+Ca | 26,235   | 25,078 - 30,674 | 0,027                | 0,021 - 0,028 | 148,82   |
| SA0085  | WT             | 25,4     | 24,657 - 26,306 | 0,027                | 0,026 - 0,028 | 178,55   |
|         | VAN            | 42,069*  | 37,771 - 49,315 | 0,017*               | 0,014 - 0,018 | 208,3*   |
|         | DAP            | 39,276*  | 34,624 - 40,284 | 0,018*               | 0,017 - 0,020 | 367,01*  |
|         | AB free        | 24,656   | 23,554 - 25,987 | 0,027                | 0,026 - 0,028 | 178,55   |
|         | AB free<br>+Ca | 25,243   | 24,123 - 26,052 | 0,027                | 0,026 - 0,028 | 178,55   |
| SA0422  | WT             | 24,251   | 24,160 - 24,532 | 0,029                | 0,028 - 0,029 | 168,6    |
|         | VAN            | 34,157*  | 33,912 - 35,260 | 0,020*               | 0,020 - 0,020 | 178,51*  |
|         | DAP            | 30,858*  | 29,273 - 34,268 | 0,022*               | 0,020 - 0,024 | 198,34*  |
| SA0736  | WT             | 45,897   | 41,283 - 50,923 | 0,013                | 0,012 - 0,017 | 178,5    |
|         | VAN            | 56,807*  | 52,749 - 62,727 | 0,012                | 0,011 - 0,013 | 208,25   |
|         | DAP-W          | 62,020*  | 57,969 - 69,021 | 0,011                | 0,010 - 0,012 | 495,85*  |
|         | DAP-Y          | 63,13*   | 57,324 - 69,766 | 0,011                | 0,010 - 0,012 | 564,41*  |
| ATCC    | WT             | 20,629   | 17,417 - 23,926 | 0,034                | 0,029 - 0,040 | 128,92   |
|         | VAN            | 26,768*  | 26,419 - 28,411 | 0,026*               | 0,024 - 0,026 | 178,51   |
|         | DAP            | 25,615   | 23,403 - 32,588 | 0,027*               | 0,021 - 0,030 | 228,09*  |

Dt—doubling time, median (M), and interquartile range (Q1–Q3) are shown; r—growth rate; Lag—lag phase of kinetic growth; WT—wild-type strain prior to selection; VAN—selection with vancomycin; DAP—selection with daptomycin. For the SA0736 strain, DAP-W and DAP-Y is the white and yellow colony after the 40th passage, respectively.
