# Supplementary material for: Adaptive Laboratory Evolution of Staphylococcus aureus Resistance to Vancomycin and Daptomycin: Mutation Patterns and Cross-Resistance
Source: Antibiotics (Basel). 2023 May 18;12(5):928. doi: 10.3390/antibiotics12050928 (PMC10215302; doi:10.3390/antibiotics12050928)
Supplement: Supplementary file 1 [file antibiotics-12-00928-s001.zip]

Archive with 8 entries (8 files):
- Supplemental_Figure_S1.pdf
- Supplemental_Figure_S2.pdf
- Supplemental_Figure_S3.pdf
- Supplemental_Table_S1.pdf
- Supplemental_Table_S2.pdf
- Supplemental_Table_S3.xlsx
- Supplemental_Table_S4.pdf
- Supplemental_Table_S5.pdf
