# Supplementary material for: Adaptive Laboratory Evolution of Staphylococcus aureus Resistance to Vancomycin and Daptomycin: Mutation Patterns and Cross-Resistance
Source: Antibiotics (Basel). 2023 May 18;12(5):928. doi: 10.3390/antibiotics12050928 (PMC10215302; doi:10.3390/antibiotics12050928)
Supplement: Supplementary file 1 [file antibiotics-12-00928-s001.zip › Supplemental_Table_S3.xlsx]

## Sheet: ALL
Supplemental Table S3. Description of all mutational events
Strain	Selection	Mutations	Breseq gene annotation	Breseq gene description	5th passage, % reads	20th passage, % reads	40th passage, % reads	System	TAG in Reference	Description
SA0077	DAP	Δ1 bp	sa77_0_02190 → / ← hld	RNA III	0	100	100	Global regulator	position 2082519	Regulatory RNA
SA0077	Ab free + Ca	C55Y (TGT→TAT)	agrA →	autoinducer sensor protein response regulator protein			8.1	Global regulator	agrA	Global regulator, accessory gene regulator protein A
SA0077	Ab free	C55Y (TGT→TAT)	agrA →	autoinducer sensor protein response regulator protein			24.3	Global regulator	agrA	Global regulator, accessory gene regulator protein A
SA0077	Ab free	A184T (GCA→ACA)	ald1 ←	alanine dehydrogenase 2			35	General metabolism	ald1	General metabolism, alanine dehydrogenase
ATCC29213	DAP	G188R (GGA→AGA)	aldH →	putative aldehyde dehydrogenase	0	35.9	0	General metabolism	aldA2	Central intermediary metabolism
SA0077	Ab free + Ca	Δ1 bp	arlR →	response regulator receiver			21.1	TCS, virulence regulation	arlR	DNA-binding response regulator ArlR
SA0085	DAP	F258S (TTT→TCT)	aroC →	chorismate synthase	5	0	0	Amino Acid Biosynthesis	aroC	Amino acid biosynthesis
SA0085	VAN	E27G (GAG→GGG)	bglA_1 ←	glycoside hydrolase	0	5.6	0	General metabolism	bglA	6-phospho-beta-glucosidase
ATCC29213	VAN	S87L (TCA→TTA)	bioA →	putative adenosylmethionine‑8‑amino‑7‑oxononanoate aminotransferase	0	0	5.9	Biotin biosynthesis	bioA	Biotin biosynthesis
ATCC29213	DAP	Δ25,224 bp	plasmid element	plasmid element	0	100	100	MGE	blaZ plasmid	Staphylococcus aureus plasmid pSK156, complete sequence
ATCC29213	VAN	Δ25,224 bp	sa29213_0_02628–sa29213_0_02658	30 genessa29213_0_02628, arsR_2, arsB_2, arsC, sa29213_0_02632, sa29213_0_02633, sa29213_0_02634, sa29213_0_02635, blaZ, sa29213_0_02637, sa29213_0_02638, sa29213_0_02639, dauA, uspA_3, sa29213_0_02642, sa29213_0_02643, csoR, sa29213_0_02645, ohrR, sa29213_0_02647, hxlR, hxlA_2, pfpI_2, sa29213_0_02652, repA_1, sa29213_0_02654, sa29213_0_02655, sa29213_0_02656, sa29213_0_02657, sa29213_0_02658	100	100	100	MGE	blaZ plasmid	Staphylococcus aureus plasmid pSK156, complete sequence
SA0422	VAN	D55Y (GAC→TAC)	clpP →	ATP‑dependent Clp protease proteolytic subunit	0	0	6.8	Protein Metabolism	clpP	Protein Metabolism
ATCC29213	DAP	A348V (GCT→GTT)	clpX ←	ATP‑dependent Clp protease ATP‑binding subunit ClpX	0	0	34.5	Protein Metabolism	clpX	Protein Metabolism, shaperon-protease, mecA regulation
SA0736	VAN	I45F (ATC→TTC)	clpX →	ATP‑dependent Clp protease ATP‑binding subunit ClpX	0	0	25.4	Protein Metabolism	clpX	Protein metabolism
SA0736	VAN	intergenic (+141/‑10)	tig → / → clpX	trigger factor (prolyl isomerase)/ATP‑dependent Clp protease ATP‑binding subunit ClpX	0	0	67.3	Protein Metabolism	clpX	Promoter Protein metabolism
SA0736	DAP	L173S (TTA→TCA)	cls1 →	phospholipase D/Transphosphatidylase	0	24.8	0	Phospholipid Biosynthesis	cls1	Cardiolipin synthetase, CM biosynthesis
SA0422	VAN	Y263H (TAT→CAT)	cls1 ←	phospholipase D/Transphosphatidylase	0	0	5.1	Phospholipid Biosynthesis	cls1	Cardiolipin synthetase, CM biosynthesis
ATCC29213	DAP	Δ1 bp	deoD →	putative purine nucleoside phosphorylase	0	0	100	DNA Metabolism	deoD2	Deoxyribose and Deoxynucleoside Catabolism
SA0085	Ab free + Ca	P457T (CCT→ACT)	dltA ←	D‑alanine‑activating enzyme/D‑alanine‑D‑alanyl, dltA protein			33.5	CW Biosynthesis	dltA	Cell Wall and Capsule
SA0077	Ab free	W64C (TGG→TGT)	dltC →	D‑alanine‑activating enzyme/D‑alanine‑D‑alanyl, dltC protein			55.8	CW Biosynthesis	dltC	Biosynthesis and degradation of murein sacculus and peptidoglycan, TA/TWA biosynthesis
SA0085	Ab free + Ca	T66K (ACA→AAA)	dltC ←	D‑alanine‑activating enzyme/D‑alanine‑D‑alanyl, dltC protein			12.8	CW Biosynthesis	dltC	Cell Wall and Capsule
SA0085	Ab free + Ca	T66A (ACA→GCA)	dltC ←	D‑alanine‑activating enzyme/D‑alanine‑D‑alanyl, dltC protein			34.6	CW Biosynthesis	dltC	Cell Wall and Capsule
SA0085	Ab free	N17I (AAT→ATT)	dltC ←	D‑alanine‑activating enzyme/D‑alanine‑D‑alanyl, dltC protein			58.2	CW Biosynthesis	dltC	Cell Wall and Capsule
SA0085	Ab free	L265I (TTA→ATA)	dltD ←	D‑alanine lipoteichoic acid and wall teichoic acid esterification secreted protein			5.1	CW Biosynthesis	dltD	Cell Wall and Capsule
ATCC29213	DAP	E362G (GAA→GGA)	dnaX ←	DNA‑directed DNA polymerase III subunit gamma and tau	0	0	5.3	DNA replication	dnaX	DNA polymerase III subunits gamma and tau
ATCC29213	DAP	D9892E (GAT→GAA)	sa29213_0_01479 ←	extracellular matrix binding protein	5.4	0	0	Surface protein	ebh	hyperosmolarity resistance protein Ebh
ATCC29213	VAN	D9920E (GAT→GAA)	sa29213_0_01479 ←	extracellular matrix binding protein	5.7	8	0	Surface protein	ebh	hyperosmolarity resistance protein Ebh
SA0736	VAN	D9640E (GAT→GAA)	sa736_0_01197 →	extracellular matrix binding protein	5.8	0	0	Surface protein	ebh	ebh
SA0085	VAN	D7489E (GAT→GAA)	sa85_0_01771 →	extracellular matrix binding protein	5.6	0	0	Surface protein	ebh	hyperosmolarity resistance protein Ebh
SA0085	VAN	D9689E (GAT→GAA)	sa85_0_01771 →	extracellular matrix binding protein	6	0	0	Surface protein	ebh	hyperosmolarity resistance protein Ebh
ATCC29213	DAP	H368R (CAT→CGT)	fabB →	3‑oxoacyl‑(acyl carrier protein) synthase II	0	0	100	Phospholipid Biosynthesis	fabF	Fatty acid and phospholipid metabolism
SA0422	DAP	I270N (ATT→AAT)	fabB →	3‑oxoacyl‑(acyl carrier protein) synthase II	0	0	24.9	Phospholipid Biosynthesis	fabF	Fatty acid and phospholipid metabolism
SA0736	DAP	A345T (GCA→ACA)	fabB ←	3‑oxoacyl‑(acyl carrier protein) synthase II	0	34.4	0	Phospholipid Biosynthesis	fabF	Fatty acid and phospholipid metabolism
SA0736	DAP	A144T (GCA→ACA)	fabB ←	3‑oxoacyl‑(acyl carrier protein) synthase II	0	67.2	100	Phospholipid Biosynthesis	fabF	Fatty acid and phospholipid metabolism
SA0736	DAP_Y	A144T (GCA→ACA)	fabB ←	3‑oxoacyl‑(acyl carrier protein) synthase II			100	Phospholipid Biosynthesis	fabF	Fatty acid and phospholipid metabolism
SA0736	DAP	E95G (GAG→GGG)	fhs ←	formyltetrahydrofolate synthetase	0	5	0	Formate Biosynthesis	fhs	Formate Supplier for Metabolic Processes during Anaerobiosis, poor studied protein
SA0077	DAP	N218D (AAC→GAC)	lip →	triacylglycerol lipase	0	0	7.5	Glycerol Metabolism	geh	Staphylococcal lipase
SA0077	DAP	Y219H (TAC→CAC)	lip →	triacylglycerol lipase	0	0	8.4	Glycerol Metabolism	geh	Staphylococcal lipase
ATCC29213	DAP	G414D (GGT→GAT)	glpD →	DNA‑directed DNA polymerase III subunit gamma and tau	26	0	0	Glycerol Metabolism	glpD	Glycerol Metabolism
ATCC29213	DAP	H65Y (CAC→TAC)	gntP →	GntP family gluconate:proton (H+) symporter	0	13	0	General metabolism	gntP	D-gluconate and ketogluconates metabolism
ATCC29213	DAP	S356F (TCT→TTT)	glpD →	DNA‑directed DNA polymerase III subunit gamma and tau	10.8	0	0	Glycerol Metabolism	gplD	Glycerol Metabolism
ATCC29213	DAP	T151A (ACA→GCA)	gpsA ←	NAD(P)H‑dependent glycerol‑3‑phosphate dehydrogenase	0	9.5	0	General metabolism	gpsA	Central metabolism
ATCC29213	DAP	T112A (ACG→GCG)	gpsA ←	NAD(P)H‑dependent glycerol‑3‑phosphate dehydrogenase	0	7.6	0	General metabolism	gpsA	Central metabolism
SA0736	DAP	M201R (ATG→AGG)	guaA ←	bifunctional GMP synthase/glutamine amidotransferase protein	0	100	100	Purine ribonucleotide biosynthesis	guaA	Purine ribonucleotide biosynthesis
SA0736	DAP_Y	M201R (ATG→AGG)	guaA ←	bifunctional GMP synthase/glutamine amidotransferase protein			100	Purine ribonucleotide biosynthesis	guaA	Purine ribonucleotide biosynthesis
ATCC29213	DAP	A218E (GCA→GAA)	hemY ←	protoporphyrinogen oxidase	7.3	8	0	Heme Biosynthesis	hemG	Heme is an essential cofactor in central metabolic pathways
ATCC29213	VAN	A218E (GCA→GAA)	hemY ←	protoporphyrinogen oxidase	7.8	12.1	0	Heme Biosynthesis	hemG	Heme is an essential cofactor in central metabolic pathways
ATCC29213	VAN	Y87* (TAT→TAA)	hisD →	putative histidinol dehydrogenase	5.8	0	0	Amino Acid Biosynthesis	hisD	Amino acid biosynthesis
SA0077	VAN	Y87* (TAT→TAA)	hisD →	putative histidinol dehydrogenase	0	10.6	0	Amino Acid Biosynthesis	hisD	Amino acid biosynthesis
SA0422	VAN	Y87* (TAT→TAA)	hisD →	putative histidinol dehydrogenase	7.5	0	0	Amino Acid Biosynthesis	hisD	Amino acid biosynthesis
SA0077	Ab free	M42I (ATG→ATA)	hutG ←	formiminoglutamase			8.6	Amino Acid Biosynthesis	hutG	Amino Acids and Derivatives
SA0077	VAN	Q261* (CAA→TAA)	kdpD →	osmosensitive K+ channel histidine kinase	0	0	100	TCS, potassium transport	kdpD	Signal transduction, general metabolism
SA0085	VAN	T95K (ACA→AAA)	kdpD →	osmosensitive K+ channel histidine kinase	5.8	0	0	TCS, potassium transport	kdpD	Signal transduction, general metabolism
ATCC29213	VAN	E125G (GAG→GGG)	lipA →	Lipoyl synthase, LipA	0	6.3	0	Lipoic acid metabolism	lipA	Lipoic acid metabolism
SA0736	DAP	A112G (GCG→GGG)	menB ←	putative naphthoate synthase	5.3	0	0	Quinol/quinone metabolism	menB	Biosynthesis of cofactors, prosthetic groups, and carriers
SA0077	VAN	I289T (ATA→ACA)	sa77_0_02648 ←	O‑succinylbenzoic acid‑‑CoA ligase	6.5	0	0	Quinol/quinone metabolism	menE	general metablosim Quinol/quinone metabolism
SA0736	DAP_Y	W66* (TGG→TGA)	mnhD_2 ←	CPA3 family monovalent cation:proton (H+) antiporter‑3 subunit D			100	Menaquinone biosynthesis	mnhD	Transport protein, monovalent cation/H+ antiporter subunit D
SA0736	DAP	Δ1 bp	sa736_0_01415 ←	molybdenum cofactor biosynthesis protein A	0	100	100	General metabolism	moaA	General metabolism, Biosynthesis of cofactors, prosthetic groups, and carriers
SA0736	DAP_Y	Δ1 bp	sa736_0_01415 ←	molybdenum cofactor biosynthesis protein A			100	General metabolism	moaA	General metabolism, Biosynthesis of cofactors, prosthetic groups, and carriers
SA0077	Ab free + Ca	D214V (GAT→GTT)	mreC →	cell shape determining protein MreC			8.2	Cell division	mreC	Cell Division and Cell Cycle, Bacterial Cytoskeleton
SA0736	DAP	T58K (ACG→AAG)	mtlD →	putative mannitol‑1‑phosphate 5‑dehydrogenase	0	0	92.5	Mannitol (Mtl) metabolism	mtlD	mannitol (Mtl) metabolism, Mannitol-1-phosphate 5-dehydrogenase
SA0736	DAP	G70* (GGA→TGA)	mutL →	DNA mismatch repair protein MutL	0	9.4	0	DNA Metabolism	mutL	DNA metabolism
ATCC29213	DAP	Δ4,565 bp	[mutL]–[glpD]	[mutL], glpP, glpF, glpK, [glpD]	0	100	100	Glycerol Metabolism	mutL–glpD	Glycerol Metabolism
SA0077	VAN	P142R (CCG→CGG)	panC →	putative pantoate‑‑beta‑alanine ligase	7.1	0	0	Pantothenate biosynthesis	panC	Biosynthesis of cofactors, prosthetic groups, and carriers
SA0085	DAP	P191S (CCT→TCT)	sa85_0_02001 ←	Oligoendopeptidase F	8	0	0	Protein Metabolism	pepF	Degradation of proteins, peptides, and glycopeptides
SA0085	Ab free + Ca	P191S (CCT→TCT)	sa85_0_02001 ←	Oligoendopeptidase F			81.3	Protein Metabolism	pepF	Degradation of proteins, peptides, and glycopeptides
SA0085	VAN	P191S (CCT→TCT)	sa85_0_02001 ←	Oligoendopeptidase F	100	100	100	Protein Metabolism	pepF	Degradation of proteins, peptides, and glycopeptides
SA0422	DAP	S177F (TCT→TTT)	pgsA →	putative CDP‑diacylglycerol‑‑glycerol‑3‑phosphate 3‑phosphatidyltransferase	0	0	100	Phospholipid Biosynthesis	pgsA	CM biosynthesis
ATCC29213	DAP	G170D (GGC→GAC)	pgsA →	putative CDP‑diacylglycerol‑‑glycerol‑3‑phosphate 3‑phosphatidyltransferase	100	100	100	Phospholipid Biosynthesis	pgsA	CM biosynthesis
ATCC29213	VAN	E661G (GAG→GGG)	pheT →	putative phenylalanyl‑tRNA synthetase beta chain	5	0	0	Protein Metabolism	pheT	Protein biosynthesis
ATCC29213	VAN	Δ7,040 bp	sa29213_0_02659–sa29213_0_02668	sa29213_0_02659, cadX, cadD, sa29213_0_02662, repA_2, sa29213_0_02664, sa29213_0_02665, sa29213_0_02666, sa29213_0_02667, sa29213_0_02668	0	100	100	MGE	plasmid	Staphylococcus aureus E-1, EDINA plasmid DNA, complete sequence
ATCC29213	DAP	Δ7,040 bp	plasmid element	plasmid element	0	100	100	MGE	plasmid element	Staphylococcus aureus E-1, EDINA plasmid DNA, complete sequence
ATCC29213	DAP	Δ3,924 bp	plasmid element	plasmid element	0	100	100	MGE	plasmid element	Staphylococcus aureus KUH140013 plasmid p01KUH140013 DNA, complete genome
ATCC29213	DAP	Δ3,588 bp	plasmid element	plasmid element	0	100	100	MGE	plasmid element	Staphylococcus aureus KUH140013 plasmid p01KUH140013 DNA, complete genome
ATCC29213	DAP	Δ1,976 bp	plasmid element	plasmid element	0	100	100	MGE	plasmid element	Staphylococcus aureus KUH140013 plasmid p01KUH140013 DNA, complete genome
ATCC29213	DAP	Δ1,488 bp	plasmid element	plasmid element	0	100	100	MGE	plasmid element	Staphylococcus aureus SI1 plasmid pWSI1 DNA, complete sequence
ATCC29213	DAP	Δ788 bp	sa29213_0_02718	sa29213_0_02718	0	100	100	MGE	plasmid element	Staphylococcus aureus KUH140013 plasmid p01KUH140013 DNA, complete genome
ATCC29213	VAN	Δ3,924 bp	sa29213_0_02673–sa29213_0_02675	sa29213_0_02673, msbA_2, sa29213_0_02675	100	100	100	MGE	plasmid element	Staphylococcus aureus KUH140013 plasmid p01KUH140013 DNA, complete genome
ATCC29213	VAN	Δ3,588 bp	sa29213_0_02676–agrA_2	sa29213_0_02676, sa29213_0_02677, sa29213_0_02678, sa29213_0_02679, sa29213_0_02680, lafA, sa29213_0_02682, agrA_2	100	100	100	MGE	plasmid element	Staphylococcus aureus KUH140013 plasmid p01KUH140013 DNA, complete genome
ATCC29213	VAN	Δ1,976 bp	sa29213_0_02713–sa29213_0_02714	sa29213_0_02713, sa29213_0_02714	100	100	100	MGE	plasmid element	Staphylococcus aureus KUH140013 plasmid p01KUH140013 DNA, complete genome
ATCC29213	VAN	Δ1,488 bp	sep_4	sep_4	100	100	100	MGE	plasmid element	Staphylococcus aureus SI1 plasmid pWSI1 DNA, complete sequence
ATCC29213	VAN	Δ788 bp	sa29213_0_02718	sa29213_0_02718	100	100	100	MGE	plasmid element	Staphylococcus aureus KUH140013 plasmid p01KUH140013 DNA, complete genome
SA0085	VAN	A399S (GCG→TCG)	pnpA ←	polynucleotide phosphorylase/polyadenylase	0	9.1	0	RNA Metabolism	pnp	mRNA degradation after traslation
ATCC29213	DAP	L71S (TTA→TCA)	proP ←	MFS family major facilitator transporter, proline/betaine:cation symporter	0	18.2	0	L-Proline/Glycine betaine transporter	proP	L-Proline/Glycine betaine transporter ProP
SA0736	DAP	E168G (GAG→GGG)	purD ←	phosphoribosylamine‑‑glycine ligase PurD	5.9	0	0	Purine biosynthesis	purD	General metabolism, Purine ribonucleotide biosynthesis
SA0736	DAP	intergenic (‑14/+8)	pykA ← / ← pfkA	pyruvate kinase/6‑phosphofructokinase	0	0	100	General metabolism	pyk	Promoter pyruvate kinase
SA0085	DAP	Y119* (TAT→TAA)	sa85_0_00400 ←	ATP‑dependent DNA helicase	0	0	30	DNA Metabolism	recQ1	DNA Metabolism
ATCC29213	VAN	Q71L (CAA→CTA)	rho ←	putative methicillin resistance expression factor	0	0	58.8	RNA Metabolism	rho	RNA Metabolism, transcription terminator
ATCC29213	DAP	A48E (GCA→GAA)	rplC →	50S ribosomal protein L3	0	8.5	0	Ribosomal protein	rplC	50S ribosomal protein L3
ATCC29213	DAP	K287E (AAA→GAA)	rpoA →	DNA‑directed RNA polymerase subunit alpha	0	20.4	0	RNA polymerase, global regulator	rpoA	DNA-directed RNA polymerase alpha subunit
SA0736	VAN	R406H (CGT→CAT)	rpoB →	DNA‑directed RNA polymerase subunit beta	0	100	100	RNA polymerase, global regulator	rpoB	Global regulator
SA0077	VAN	Y353C (TAC→TGC)	rpoC →	DNA‑directed RNA polymerase beta' chain protein	5.1	0	0	RNA polymerase, global regulator	rpoC	Global regulator
SA0077	VAN	A949S (GCA→TCA)	rpoC →	DNA‑directed RNA polymerase beta' chain protein	0	100	100	RNA polymerase, global regulator	rpoC	Global regulator
SA0736	VAN	T1134I (ACA→ATA)	rpoC →	DNA‑directed RNA polymerase beta' chain protein	30.7	0	0	RNA polymerase, global regulator	rpoC	Global regulator
ATCC29213	VAN	Δ24 bp	rpsO →	30S ribosomal protein S15	0	5.1	0	Ribosomal protein	rpsO	30S ribosomal protein S15
ATCC29213	DAP	C→T	rpsU ← / ← sa29213_0_02144	30S ribosomal protein S21/radical SAM domain‑containing protein	0	100	100	Ribosomal protein	rpsU	30S ribosomal protein S21
SA0085	VAN	T345K (ACA→AAA)	pdhC ←	pyruvate dehydrogenase complex dihydrolipoyllysine‑residue acetyltransferase	100	100	100	TCA	SACOL_RS05640	TCA cycle
SA0085	VAN	D345Y (GAT→TAT)	sa85_0_02070 ←	hypothetical protein	9.2	0	0	Proteins of Unknown Function	SACOL_RS08885	hypothetical protein
SA0085	Ab free + Ca	Δ16,210 bp	cadX–sa85_0_02628	15 genescadX, cadA, cadD, sa85_0_02617, sa85_0_02618, sa85_0_02619, sa85_0_02620, sa85_0_02621, xylR, mecI, mecR1, mecA, maoC, ugpQ_1, sa85_0_02628			100	MGE	SACOL0033	SCCmec
SA0085	Ab free	Δ16,210 bp	cadX–sa85_0_02628	15 genescadX, cadA, cadD, sa85_0_02617, sa85_0_02618, sa85_0_02619, sa85_0_02620, sa85_0_02621, xylR, mecI, mecR1, mecA, maoC, ugpQ_1, sa85_0_02628			100	MGE	SACOL0033	SCCmec
SA0077	DAP	Δ1 bp	sa77_0_00309 →	hypothetical protein	0	100	100	MGE	SACOL0038	SCCmec element
SA0077	DAP	I719V (ATC→GTC)	sa77_0_01022 →	bifunctional AraC family transcriptional regulator/xylan 1,4‑beta‑xylosidase	0	0	9.3	Putative regulator	SACOL0084	Uncharacterized HTH-type transcriptional regulator
SA0077	DAP	I719M (ATC→ATG)	sa77_0_01022 →	bifunctional AraC family transcriptional regulator/xylan 1,4‑beta‑xylosidase	0	0	9.1	Putative regulator	SACOL0084	Uncharacterized HTH-type transcriptional regulator
SA0422	VAN	S33P (TCA→CCA)	nptA →	Na+/phosphate symporter	27.1	0	0	Na+/phosphate transporter	SACOL0088	General metabolism, Na/Pi cotransporter family protein
SA0736	VAN	R37S (AGG→AGC)	nptA ←	Na+/phosphate symporter	0	0	6.5	Na+/phosphate transporter	SACOL0088	General metabolism, Na/Pi cotransporter family protein
SA0736	VAN	S33P (TCA→CCA)	nptA ←	Na+/phosphate symporter	0	0	7.7	Na+/phosphate transporter	SACOL0088	General metabolism, Na/Pi cotransporter family protein
SA0085	VAN	Q31* (CAA→TAA)	nptA ←	Na+/phosphate symporter	14.7	0	0	Na+/phosphate transporter	SACOL0088	General metabolism, Na/Pi cotransporter family protein
SA0736	DAP	N193K (AAT→AAA)	sa736_0_01510 →	ornithine cyclodeaminase	0	21.1	0	Amino Acid Biosynthesis	SACOL0101	General metabolism, biosynthesis Amino Acids and Derivatives
ATCC29213	DAP	M198I (ATG→ATA)	sa29213_0_00071 ←	glycoside hydrolase family protein	0	0	40	Exopolysaccharide Biosynthesis	SACOL0115	Exopolysaccharide Biosynthesis
SA0077	DAP	S173T (TCA→ACA)	cap5E →	capsular polysaccharide biosynthesis protein Cap5E	8.7	8.4	0	Capsular polysaccharide biosynthesis	SACOL0140 (cap5E)	Capsular polysaccharide biosynthesis protein Cap5E
ATCC29213	VAN	S173T (TCA→ACA)	cap5E ←	capsular polysaccharide biosynthesis protein Cap5E	5.5	6.1	0	Capsular polysaccharide biosynthesis	SACOL0140 (cap5E)	Capsular polysaccharide biosynthesis protein Cap5E
SA0422	VAN	S173T (TCA→ACA)	cap5E ←	capsular polysaccharide biosynthesis protein Cap5E	5.1	0	0	Capsular polysaccharide biosynthesis	SACOL0140 (cap5E)	Capsular polysaccharide biosynthesis protein Cap5E
ATCC29213	DAP	Δ1 bp	cap5E ←	capsular polysaccharide biosynthesis protein Cap5E	0	0	100	Capsular polysaccharide biosynthesis	SACOL0140 (cap5E)	Capsular polysaccharide biosynthesis protein Cap5E
SA0077	DAP	E15D (GAA→GAC)	sa77_0_01100 →	formate dehydrogenase	0	0	6.7	Amino acid biosynthesis	SACOL0162	Amino acid biosynthesis
SA0077	DAP	V41A (GTT→GCT)	sa77_0_01112 ←	isochorismatase family protein	0	0	6.2	Pyrimidine degradation	SACOL0172 (entB)	Putative pyrimidine utilization protein B
SA0077	DAP	D40E (GAT→GAA)	sa77_0_01112 ←	isochorismatase family protein	0	0	5.4	Pyrimidine degradation	SACOL0172 (entB)	Putative pyrimidine utilization protein B
SA0085	Ab free	Q591H (CAA→CAT)	rlp →	ABC‑type dipeptide transport system periplasmic component‑like protein			64.2	Proteins of Unknown Function	SACOL0187	hypothetical protein
ATCC29213	DAP	D115E (GAT→GAA)	sa29213_0_00781 →	putative staphylococcal lipoprotein	7.5	0	0	Proteins of Unknown Function	SACOL0189	hypothetical protein
SA0077	DAP	V432L (GTA→CTA)	sa77_0_02002 →	transmembrane efflux pump protein	0	100	100	Putative transporter	SACOL0261	Putative proton/drug antiporter efflux pump
SA0077	DAP	I303S (ATT→AGT)	sa77_0_01998 →	hypothetical protein	0	0	9.3	Proteins of Unknown Function	SACOL0265	hypothetical protein
ATCC29213	DAP	I35V (ATA→GTA)	yezG_4 ←	putative antitoxin YezG	6.7	0	0	Proteins of Unknown Function	SACOL0286	hypothetical protein
ATCC29213	DAP	M32I (ATG→ATT)	yezG_4 ←	putative antitoxin YezG	6.8	0	0	Proteins of Unknown Function	SACOL0286	hypothetical protein
ATCC29213	DAP	S20R (AGC→AGG)	yezG_4 ←	putative antitoxin YezG	6.8	0	0	Proteins of Unknown Function	SACOL0286	hypothetical protein
ATCC29213	DAP	S20G (AGC→GGC)	yezG_4 ←	putative antitoxin YezG	7	0	0	Proteins of Unknown Function	SACOL0286	hypothetical protein
ATCC29213	DAP	K17E (AAG→GAG)	yezG_4 ←	putative antitoxin YezG	6.9	0	0	Proteins of Unknown Function	SACOL0286	hypothetical protein
SA0736	DAP	I74L (ATA→TTA)	sa736_0_02768 ←	hypothetical protein	0	0	10.9	Proteins of Unknown Function	SACOL0288	hypothetical protein
SA0736	DAP_Y	I74L (ATA→TTA)	sa736_0_02768 ←	hypothetical protein			12.8	Proteins of Unknown Function	SACOL0288	hypothetical protein
SA0077	DAP	D95E (GAT→GAA)	sa77_0_01975 ←	hypothetical protein	6.3	0	0	Proteins of Unknown Function	SACOL0288	hypothetical protein
SA0077	VAN	L99Q (CTA→CAA)	sa77_0_01975 ←	hypothetical protein	0	6.2	0	Proteins of Unknown Function	SACOL0288	hypothetical protein
SA0077	VAN	D95E (GAT→GAA)	sa77_0_01975 ←	hypothetical protein	0	5.7	0	Proteins of Unknown Function	SACOL0288	hypothetical protein
SA0736	VAN	I74L (ATA→TTA)	sa736_0_02768 ←	hypothetical protein	0	9.6	17.3	Proteins of Unknown Function	SACOL0288	hypothetical protein
SA0077	Ab free	D110G (GAT→GGT)	sa77_0_01963 ←	secreted acid phosphatase			29.8	Biosynthesis of cofactors	SACOL0303	Biosynthesis of cofactors, prosthetic groups, and carriers
SA0077	VAN	V81I (GTA→ATA)	sa77_0_02856 ←	hypothetical protein	0	12.5	0	Proteins of Unknown Function	SACOL0387	hypothetical protein
SA0077	VAN	M222I (ATG→ATA)	sa77_0_01920 ←	luciferase‑like monooxygenase	5.5	0	0	Proteins of Unknown Function	SACOL0394	hypothetical protein
SA0085	Ab free + Ca	N233S (AAC→AGC)	sa85_0_00807 ←	imelysin			79.9	Putative lipoprotein	SACOL0414	Putative lipoprotein
SA0085	VAN	N233S (AAC→AGC)	sa85_0_00807 ←	imelysin	100	100	100	Putative lipoprotein	SACOL0414	Putative lipoprotein
SA0085	Ab free	A157E (GCG→GAG)	sa85_0_02083 ←	N‑acetyltransferase GCN5			16.9	Proteins of Unknown Function	SACOL0511	hypothetical protein
ATCC29213	VAN	Δ6 bp	yaaQ ←	putative protein YaaQ	0	0	70.2	Proteins of Unknown Function	SACOL0525	hypothetical protein
SA0077	VAN	E15G (GAG→GGG)	sa77_0_02316 ←	redox regulated Hsp33‑like chaperonin	0	9.7	0	Proteins of Unknown Function	SACOL0556	hypothetical protein
SA0077	Ab free + Ca	P160L (CCA→CTA)	sa77_0_01596 →	Integral membrane protein (PIN domain superfamily)			7.5	General metabolism	SACOL0573	General metabolism
SA0077	Ab free + Ca	V317L (GTA→TTA)	sa77_0_01596 →	Integral membrane protein (PIN domain superfamily)			6.4	General metabolism	SACOL0573	General metabolism
SA0077	Ab free	G301S (GGT→AGT)	sa77_0_01596 →	Integral membrane protein (PIN domain superfamily)			36.6	General metabolism	SACOL0573	General metabolism
SA0422	VAN	S60T (TCG→ACG)	yacP ←	putative protein YacP	7.1	0	0	Proteins of Unknown Function	SACOL0579	hypothetical protein
ATCC29213	DAP	N12S (AAT→AGT)	kbl ←	putative pyridoxal phosphate‑dependent acyltransferase	0	0	10.8	Glycine and Serine Utilization	SACOL0596	Glycine and Serine Utilization
ATCC29213	DAP	E132G (GAG→GGG)	lplA2 ←	lipoate‑protein ligase A family protein	5.5	0	0	Lipoic acid metabolism	SACOL0635	Central carbohydrate metabolism, lipoic acid metabolism
SA0077	Ab free	G75V (GGT→GTT)	sa77_0_01012 ←	hypothetical protein			8.7	Proteins of Unknown Function	SACOL0653	hypothetical protein
SA0077	Ab free + Ca	I229V (ATT→GTT)	sa77_0_00998 ←	iron (Fe3+) ABC superfamily ATP binding cassette transporter, membrane protein			6.6	General metabolism	SACOL0666	General metabolism
ATCC29213	VAN	S102I (AGT→ATT)	sa29213_0_01816 ←	hypothetical protein	0	100	100	Proteins of Unknown Function	SACOL0670	hypothetical protein
ATCC29213	DAP	S45G (AGT→GGT)	mnhB_2 ←	monovalent cation antiporter‑3, MnhB_1	0	19.3	0	Proton (H+/Na+) transporter	SACOL0680	Membrane Transport
ATCC29213	VAN	S308R (AGT→AGA)	sa29213_0_01769 ←	putative permease	0	100	100	Putative regulator	SACOL0720	vraG
SA0077	Ab free	L590S (TTA→TCA)	sa77_0_00947 ←	putative permease			11.8	Putative regulator	SACOL0720	vraG
SA0422	VAN	A166P (GCA→CCA)	pitA →	low‑affinity inorganic phosphate transporter	0	100	100	Phosphorus Metabolism	SACOL0722	Phosphorus Metabolism
SA0085	VAN	Δ11 bp	pitA ←	low‑affinity inorganic phosphate transporter	0	36.8	0	Phosphorus Metabolism	SACOL0722	Phosphorus Metabolism
SA0085	VAN	Δ12 bp	pitA ←	low‑affinity inorganic phosphate transporter	0	21.1	0	Phosphorus Metabolism	SACOL0722	Phosphorus Metabolism
SA0077	DAP	L220I (TTA→ATA)	uppP →	undecaprenyl pyrophosphate phosphatase	0	0	5.9	CW Biosynthesis	SACOL0743 (bacA)	Biosynthesis and degradation of murein sacculus and peptidoglycan
SA0085	DAP	G69S (GGT→AGT)	gap ←	glyceraldehyde‑3‑phosphate dehydrogenase (phosphorylating)	0	0	10	General metabolism	SACOL0838	Central carbohydrate metabolism
SA0422	VAN	G36D (GGC→GAC)	sa422_0_00489 ←	hypothetical protein	0	5.5	0	Proteins of Unknown Function	SACOL0863	hypothetical protein
SA0736	VAN	K95* (AAA→TAA)	ywqG →	putative protein YwqG	5	0	0	Proteins of Unknown Function	SACOL0879	hypothetical protein
ATCC29213	DAP	A58T (GCA→ACA)	sa29213_0_01019 ←	hypothetical protein	0	23	0	Proteins of Unknown Function	SACOL0908	hypothetical protein
SA0422	DAP	Δ18 bp	sa422_0_00541 →	pyridine nucleotide‑disulfide oxidoreductase	94.1	100	100	General metabolism	SACOL0944	General metabolism, respiration, NADH dehydrogenase
SA0736	VAN	Y84H (TAT→CAT)	ampA →	cytosol aminopeptidase	0	0	6.3	General metabolism	SACOL0945	General metabolism, Cytosol aminopeptidase
SA0077	DAP	E143* (GAA→TAA)	mnhE_2 ←	CPA3 family monovalent cation:proton (H+) antiporter‑3 subunit E	0	100	0	Proton (H+/Na+) transporter	SACOL0951 (mnhE)	Transport and binding proteins
ATCC29213	DAP	E95G (GAA→GGA)	sa29213_0_01056 →	S1 RNA‑binding domain protein	0	79.4	0	General stress protein 13	SACOL0958	General stress protein 13
SA0736	DAP	G48V (GGT→GTT)	sa736_0_02315 ←	putative permease	0	0	7.3	Proteins of Unknown Function	SACOL1017	hypothetical protein
SA0085	DAP	K234* (AAG→TAG)	sa85_0_01306 ←	Trypsin‑like serine protease	0	0	6	Protein Metabolism	SACOL1028	Degradation of proteins, peptides, and glycopeptides
SA0085	Ab free	Y180D (TAT→GAT)	sa85_0_01270 ←	Autolysis and methicillin resistant‑related protein			44.4	TA Biosynthesis	SACOL1066	fmtA
ATCC29213	DAP	A145E (GCA→GAA)	isdB ←	iron transport associated domain‑containing protein	6.2	0	0	Surface protein	SACOL1138	LPXTG cell wall surface anchor protein
ATCC29213	DAP	R459* (CGA→TGA)	sa29213_0_02325 →	bifunctional DNA polymerase / phosphoesterase	5.1	0	0	Proteins of Unknown Function	SACOL1153	hypothetical protein
SA0085	DAP	Δ1 bp	sa85_0_00661 ←	alanine racemase	0	100	100	Proteins of Unknown Function	SACOL1201	hypothetical protein
ATCC29213	DAP	P124S (CCA→TCA)	clpQ →	T01 family HslV component of HsIUV peptidase	0	0	100	Protein Metabolism	SACOL1270	HslUV is a bacterial heat shock protein complex, HslV is a threonine (Thr) protease employing the N-terminal Thr residue in the mature protein as the catalytic residue
ATCC29213	VAN	A1298S (GCG→TCG)	polC →	DNA polymerase III subunit alpha	7.2	0	0	DNA Metabolism	SACOL1283	DNA metabolism
SA0085	VAN	D102E (GAT→GAA)	sa85_0_00560 ←	phosphodiesterase	8.3	0	0	RNA Metabolism	SACOL1305	Ribonuclease Y
ATCC29213	DAP	Δ1 bp	bsaA ←	putative glutathione peroxidase	0	0	100	Stress response protein	SACOL1325	gpxA1, glutathione peroxidase
SA0422	DAP	S295L (TCA→TTA)	mprF	oxacillin resistance‑related FmtC protein	100	100	100	Phospholipid Biosynthesis	SACOL1396	Multiple Peptide Resistance Factor, produce thecationic phospholipid lysylphosphatidyl-glycerol (LysPG), CM biosynthesis
SA0085	VAN	P314L (CCT→CTT)	mprF	oxacillin resistance‑related FmtC protein	0	100	100	Phospholipid Biosynthesis	SACOL1396	Multiple Peptide Resistance Factor, produce thecationic phospholipid lysylphosphatidyl-glycerol (LysPG), CM biosynthesis
ATCC29213	DAP	S136L (TCA→TTA)	mprF	oxacillin resistance‑related FmtC protein	0	0	15.3	Phospholipid Biosynthesis	SACOL1396	Multiple Peptide Resistance Factor, produce thecationic phospholipid lysylphosphatidyl-glycerol (LysPG), CM biosynthesis
ATCC29213	DAP	L826F (CTT→TTT)	mprF	oxacillin resistance‑related FmtC protein	0	100	100	Phospholipid Biosynthesis	SACOL1396	Multiple Peptide Resistance Factor, produce thecationic phospholipid lysylphosphatidyl-glycerol (LysPG), CM biosynthesis
SA0077	DAP	L826F (CTT→TTT)	mprF	oxacillin resistance‑related FmtC protein	0	100	100	Phospholipid Biosynthesis	SACOL1396	Multiple Peptide Resistance Factor, produce thecationic phospholipid lysylphosphatidyl-glycerol (LysPG), CM biosynthesis
SA0085	DAP	S295L (TCA→TTA)	mprF	oxacillin resistance‑related FmtC protein	0	100	100	Phospholipid Biosynthesis	SACOL1396	Multiple Peptide Resistance Factor, produce thecationic phospholipid lysylphosphatidyl-glycerol (LysPG), CM biosynthesis
SA0422	DAP	R50H (CGT→CAT)	mprF	oxacillin resistance‑related FmtC protein	0	14.8	0	Phospholipid Biosynthesis	SACOL1396	Multiple Peptide Resistance Factor, produce thecationic phospholipid lysylphosphatidyl-glycerol (LysPG), CM biosynthesis
SA0736	DAP	S309L (TCA→TTA)	mprF	oxacillin resistance‑related FmtC protein	0	100	100	Phospholipid Biosynthesis	SACOL1396	Multiple Peptide Resistance Factor, produce thecationic phospholipid lysylphosphatidyl-glycerol (LysPG), CM biosynthesis
SA0736	DAP_Y	S309L (TCA→TTA)	mprF	oxacillin resistance‑related FmtC protein			100	Phospholipid Biosynthesis	SACOL1396	Multiple Peptide Resistance Factor, produce thecationic phospholipid lysylphosphatidyl-glycerol (LysPG), CM biosynthesis
ATCC29213	DAP	Δ1 bp	sa29213_0_01465 ←	serine protease	0	9.8	92	Protein Metabolism	SACOL1455	Carboxyl-terminal protease, Protein modification and repair
SA0085	VAN	E65G (GAG→GGG)	norB ←	nitric oxide reductase large subunit	5.5	0	0	Putative transporter	SACOL1475	Putative transporter
SA0077	DAP	E224D (GAA→GAT)	pbp2	glycosyl transferase family protein	0	100	100	CW Biosynthesis	SACOL1490 (pbp2)	PBP, CW biosynthesis
SA0085	DAP	Δ1 bp	gerCC →	iron (Fe3+) ABC superfamily ATP binding cassette transporter, membrane protein	0	0	100	Glycerol Metabolism	SACOL1510	Fatty Acids, Lipids, and Isoprenoids
SA0736	DAP_Y	Δ1 bp	sa736_0_02429 →	putative 2‑heptaprenyl‑1,4‑naphthoquinone methyltransferase			100	Quinol/quinone metabolism	SACOL1511 (menG)	General metabolism Biosynthesis of cofactors, prosthetic groups, and carriers
SA0077	Ab free	M214T (ATG→ACG)	sa77_0_02471 ←	FAD‑dependent pyridine nucleotide‑disulfide oxidoreductase			5.3	Proteins of Unknown Function	SACOL1520	hypothetical protein
SA0077	Ab free + Ca	V192E (GTG→GAG)	sa77_0_00722 →	putative lipoprotein			12.9	Putative lipoprotein	SACOL1531	Putative lipoprotein
SA0077	VAN	D271E (GAT→GAA)	sa77_0_00601 →	peptidase U32 family protein	0	12.9	0	Proteins of Unknown Function	SACOL1668	hypothetical protein
SA0422	VAN	P291T (CCT→ACT)	sa422_0_00944 ←	peptidase U32 family protein	5.7	0	0	Proteins of Unknown Function	SACOL1668	hypothetical protein
ATCC29213	VAN	V385L (GTA→TTA)	harA ←	haptoglobin‑binding surface anchored protein, HarA	0	0	5.4	Iron Metabolism	SACOL1781	Iron acquisition and metabolism
SA0085	Ab free	N268Y (AAT→TAT)	harA ←	haptoglobin‑binding surface anchored protein, HarA			9.2	Iron Metabolism	SACOL1781	Iron acquisition and metabolism
ATCC29213	DAP	D171E (GAC→GAA)	sa29213_0_00514 ←	hypothetical protein	6.4	0	0	Proteins of Unknown Function	SACOL1788	hypothetical protein
ATCC29213	DAP	S151A (TCG→GCG)	sa29213_0_00514 ←	hypothetical protein	8.6	0	5	Proteins of Unknown Function	SACOL1788	hypothetical protein
SA0077	Ab free + Ca	S144T (TCA→ACA)	sa77_0_01701 →	hypothetical protein			6.1	Proteins of Unknown Function	SACOL1788	hypothetical protein
ATCC29213	DAP	V204A (GTG→GCG)	sa29213_0_00514 ←	hypothetical protein	0	10.5	5	Proteins of Unknown Function	SACOL1788	hypothetical protein
ATCC29213	DAP	S144T (TCA→ACA)	sa29213_0_00514 ←	hypothetical protein	11.4	0	6	Proteins of Unknown Function	SACOL1788	hypothetical protein
ATCC29213	DAP	V155E (GTA→GAA)	sa29213_0_00514 ←	hypothetical protein	0	0	5	Proteins of Unknown Function	SACOL1788	hypothetical protein
ATCC29213	DAP	A137T (GCG→ACG) ‡	sa29213_0_00514 ←	hypothetical protein	9.6	0	0	Proteins of Unknown Function	SACOL1788	hypothetical protein
SA0077	DAP	S144T (TCA→ACA)	sa77_0_01701 →	hypothetical protein	6.1	13.6	0	Proteins of Unknown Function	SACOL1788	hypothetical protein
SA0077	DAP	S148T (TCA→ACA)	sa77_0_01701 →	hypothetical protein	5.4	6.3	0	Proteins of Unknown Function	SACOL1788	hypothetical protein
SA0077	DAP	S197T (TCA→ACA)	sa77_0_01701 →	hypothetical protein	9.7	11.5	8.9	Proteins of Unknown Function	SACOL1788	hypothetical protein
SA0085	DAP	A137T (GCG→ACG)	sa85_0_01815 ←	hypothetical protein	6	0	0	Proteins of Unknown Function	SACOL1788	hypothetical protein
SA0085	DAP	S144T (TCA→ACA)	sa85_0_01815 ←	hypothetical protein	6	10	0	Proteins of Unknown Function	SACOL1788	hypothetical protein
SA0077	Ab free + Ca	S197T (TCA→ACA)	sa77_0_01701 →	hypothetical protein			7.2	Proteins of Unknown Function	SACOL1788	hypothetical protein
SA0085	Ab free	S197T (TCA→ACA)	sa85_0_01815 ←	hypothetical protein			5.8	Proteins of Unknown Function	SACOL1788	hypothetical protein
SA0085	Ab free	S144T (TCA→ACA)	sa85_0_01815 ←	hypothetical protein			6.8	Proteins of Unknown Function	SACOL1788	hypothetical protein
SA0085	DAP	S197T (TCA→ACA)	sa85_0_01815 ←	hypothetical protein	6	10	6	Proteins of Unknown Function	SACOL1788	hypothetical protein
SA0422	DAP	A137T (GCG→ACG)	sa422_0_01339 →	hypothetical protein	9.1	0	0	Proteins of Unknown Function	SACOL1788	hypothetical protein
SA0422	DAP	S144T (TCA→ACA)	sa422_0_01339 →	hypothetical protein	8.1	11.8	5.2	Proteins of Unknown Function	SACOL1788	hypothetical protein
SA0422	DAP	S148T (TCA→ACA)	sa422_0_01339 →	hypothetical protein	6.3	0	0	Proteins of Unknown Function	SACOL1788	hypothetical protein
SA0422	DAP	S197T (TCA→ACA)	sa422_0_01339 →	hypothetical protein	9.1	10.6	5.7	Proteins of Unknown Function	SACOL1788	hypothetical protein
SA0736	DAP	S197T (TCA→ACA)	sa736_0_00879 ←	hypothetical protein	10.6	10.8	10.2	Proteins of Unknown Function	SACOL1788	hypothetical protein
SA0422	DAP	V151E (GTG→GAG)	sa422_0_01339 →	hypothetical protein	0	5.6	0	Proteins of Unknown Function	SACOL1788	hypothetical protein
SA0736	DAP	V151A (GTG→GCG)	sa736_0_00879 ←	hypothetical protein	5.2	0	0	Proteins of Unknown Function	SACOL1788	hypothetical protein
SA0422	DAP	S226T (TCA→ACA)	sa422_0_01339 →	hypothetical protein	0	6.3	0	Proteins of Unknown Function	SACOL1788	hypothetical protein
SA0736	DAP	S144T (TCA→ACA)	sa736_0_00879 ←	hypothetical protein	10	9.9	0	Proteins of Unknown Function	SACOL1788	hypothetical protein
SA0736	DAP	V151E (GTG→GAG)	sa736_0_00879 ←	hypothetical protein	0	5.2	0	Proteins of Unknown Function	SACOL1788	hypothetical protein
SA0736	DAP_Y	S197T (TCA→ACA)	sa736_0_00879 ←	hypothetical protein			9.1	Proteins of Unknown Function	SACOL1788	hypothetical protein
SA0077	VAN	S144T (TCA→ACA)	sa77_0_01701 →	hypothetical protein	0	0	5.7	Proteins of Unknown Function	SACOL1788	hypothetical protein
SA0077	VAN	S197T (TCA→ACA)	sa77_0_01701 →	hypothetical protein	0	10.4	5.9	Proteins of Unknown Function	SACOL1788	hypothetical protein
SA0422	VAN	A137T (GCG→ACG)	sa422_0_01339 →	hypothetical protein	8.6	0	0	Proteins of Unknown Function	SACOL1788	hypothetical protein
SA0422	VAN	S144T (TCA→ACA)	sa422_0_01339 →	hypothetical protein	10.5	11.4	0	Proteins of Unknown Function	SACOL1788	hypothetical protein
SA0422	VAN	S148T (TCA→ACA)	sa422_0_01339 →	hypothetical protein	7.4	0	0	Proteins of Unknown Function	SACOL1788	hypothetical protein
SA0422	VAN	S197T (TCA→ACA)	sa422_0_01339 →	hypothetical protein	10.7	9.2	7.6	Proteins of Unknown Function	SACOL1788	hypothetical protein
SA0736	VAN	S197T (TCA→ACA)	sa736_0_00879 ←	hypothetical protein	13	12.9	11.1	Proteins of Unknown Function	SACOL1788	hypothetical protein
SA0736	VAN	S144T (TCA→ACA)	sa736_0_00879 ←	hypothetical protein	14.1	0	0	Proteins of Unknown Function	SACOL1788	hypothetical protein
SA0085	VAN	S197T (TCA→ACA)	sa85_0_01815 ←	hypothetical protein	12.7	9.5	7.7	Proteins of Unknown Function	SACOL1788	hypothetical protein
SA0085	VAN	S144T (TCA→ACA)	sa85_0_01815 ←	hypothetical protein	13.2	11.9	0	Proteins of Unknown Function	SACOL1788	hypothetical protein
SA0085	VAN	A286V (GCC→GTC)	sa85_0_02531 →	O‑succinylbenzoic acid‑‑CoA ligase	5.1	0	0	Menaquinone and Phylloquinone Biosynthesis	SACOL1844	Menaquinone and Phylloquinone Biosynthesis
SA0085	VAN	M288L (ATG→CTG)	sa85_0_02531 →	O‑succinylbenzoic acid‑‑CoA ligase	5.7	0	0	Menaquinone and Phylloquinone Biosynthesis	SACOL1844	Menaquinone and Phylloquinone Biosynthesis
SA0085	VAN	S59L (TCA→TTA)	prsA →	peptidylprolyl isomerase, PrsA	0	0	76.8	Protein Metabolism	SACOL1897	Foldase, aux factor for mecA
SA0736	DAP	Y238C (TAT→TGT)	prsA →	peptidylprolyl isomerase, PrsA	0	7.9	0	Protein Metabolism	SACOL1897	Foldase, aux factor for mecA
SA0077	VAN	intergenic (+170/‑186)	yhcR → / → sa77_0_02272	two‑component response regulator receiver protein/transcriptional regulator	100	100	100	Putative regulator	SACOL1904	putative transcriptional regulator
ATCC29213	DAP	E190G (GAG→GGG)	yfhP ←	putative protein YfhP	0	6.2	0	Proteins of Unknown Function	SACOL1927 (yfhP)	hypothetical protein
SA0085	DAP	G113D (GGT→GAT)	yfhP →	putative protein YfhP	0	6	0	Proteins of Unknown Function	SACOL1927 (yfhP)	hypothetical protein
SA0085	DAP	W265* (TGG→TGA)	yfhP →	putative protein YfhP	0	90	100	Proteins of Unknown Function	SACOL1927 (yfhP)	hypothetical protein
SA0422	DAP	Δ1 bp	yfhP ←	putative protein YfhP	0	0	8.7	Proteins of Unknown Function	SACOL1927 (yfhP)	hypothetical protein
SA0422	DAP	N52I (AAT→ATT)	yfhP ←	putative protein YfhP	0	0	67.2	Proteins of Unknown Function	SACOL1927 (yfhP)	hypothetical protein
ATCC29213	VAN	T212I (ACA→ATA)	sgtB →	monofunctional glycosyltransferase	0	8.7	0	CW Biosynthesis	SACOL1932	CW boisynthesis
ATCC29213	VAN	P126S (CCA→TCA)	sa29213_0_02478 →	vraT	0	25.6	76.7	CW Biosynthesis	SACOL1944	CW regulator
ATCC29213	VAN	Y187D (TAT→GAT)	sa29213_0_02478 →	vraT	0	22.2	0	CW Biosynthesis	SACOL1944	CW regulator
SA0077	Ab free + Ca	Y119H (TAT→CAT)	sa77_0_02061 ←	hypothetical protein			15.6	Proteins of Unknown Function	SACOL1945	hypothetical protein
ATCC29213	DAP	Δ1 bp	sa29213_0_02475 ←	hypothetical protein	0	100	0	Proteins of Unknown Function	SACOL1947	hypothetical protein
ATCC29213	VAN	E253G (GAA→GGA)	sa29213_0_01941 ←	ABC superfamily ATP binding cassette transporter, ABC protein	0	6	0	Putative transporter	SACOL1996	Transport and binding proteins
ATCC29213	DAP	T51A (ACA→GCA)	nrgA ←	AMT family ammonium or ammonia transporter	0	0	7.7	Ammonium transporter	SACOL2031	Ammonium transporter family protein
ATCC29213	DAP	A23V (GCA→GTA)	cls2 →	phospholipase D/Transphosphatidylase	0	0	100	Phospholipid Biosynthesis	SACOL2079 (cls2)	Cardiolipin synthetase, CM biosynthesis
SA0077	DAP	L52F (TTA→TTC)	cls2 →	phospholipase D/Transphosphatidylase	0	0	100	Phospholipid Biosynthesis	SACOL2079 (cls2)	Cardiolipin synthetase, CM biosynthesis
SA0077	DAP	D82Y (GAT→TAT)	cls2 →	phospholipase D/Transphosphatidylase	0	100	0	Phospholipid Biosynthesis	SACOL2079 (cls2)	Cardiolipin synthetase, CM biosynthesis
SA0077	DAP	A280T (GCA→ACA)	cls2 →	phospholipase D/Transphosphatidylase	0	0	100	Phospholipid Biosynthesis	SACOL2079 (cls2)	Cardiolipin synthetase, CM biosynthesis
SA0085	DAP	T33N (ACC→AAC)	cls2 →	phospholipase D/Transphosphatidylase	0	100	100	Phospholipid Biosynthesis	SACOL2079 (cls2)	Phospholipids biosynthesis
SA0422	DAP	R295C (CGT→TGT)	cls2 →	phospholipase D/Transphosphatidylase	0	0	100	Phospholipid Biosynthesis	SACOL2079 (cls2)	Cardiolipin synthetase, CM biosynthesis
SA0736	DAP	A23V (GCA→GTA)	cls2 ←	phospholipase D/Transphosphatidylase	0	100	100	Phospholipid Biosynthesis	SACOL2079 (cls2)	Cardiolipin synthetase, CM biosynthesis
SA0736	DAP_Y	A23V (GCA→GTA)	cls2 ←	phospholipase D/Transphosphatidylase			100	Phospholipid Biosynthesis	SACOL2079 (cls2)	Cardiolipin synthetase, CM biosynthesis
SA0077	VAN	E184G (GAG→GGG)	aldA ←	aldehyde dehydrogenase family protein	0	6.3	0	General metabolism	SACOL2114	General metabolism
SA0736	DAP	D126V (GAT→GTT)	sepA →	Multidrug resistance efflux pump SepA	0	0	100	Efflux pump	SACOL2158	efflux pump that confers low-level resistance to antiseptic compounds, namely benzalkonium chloride, chlorhexidine gluconate and the dye acriflavine
SA0422	DAP	Δ1,241 bp	[sepA]–[sa422_0_02620]	[sepA], [sa422_0_02620]	0	0	100	Efflux pump	SACOL2158-SACOL2157	EmrB/QacA family drug resistance transporter
ATCC29213	DAP	E163G (GAG→GGG)	sa29213_0_02540 →	hypothetical protein	6.1	0	0	Putative transporter	SACOL2164	Predicted arginine uptake transporter
ATCC29213	VAN	Δ2 bp	sa29213_0_02538 →	iron compound ABC transporter permease	100	100	100	Proteins of Unknown Function	SACOL2166	hypothetical protein
SA0085	VAN	E188G (GAG→GGG)	sa85_0_02607 →	putative NADP‑dependent zinc‑binding dehydrogenase	5.2	0	0	Putative oxidoreductase	SACOL2178	Putative oxidoreductase
ATCC29213	DAP	P45S (CCA→TCA)	sa29213_0_02526 →	alpha/beta cell surface hydrolase	0	29.4	0	Proteins of Unknown Function	SACOL2179	hypothetical protein
SA0077	DAP	I469V (ATA→GTA)	sa77_0_00016 ←	helix‑turn‑helix‑ domain containing protein	0	0	100	Transcriptional regulator	SACOL2290	AraC family transcriptional regulator
SA0422	VAN	E627* (GAA→TAA)	sa422_0_01274 ←	helix‑turn‑helix‑ domain containing protein	0	12.4	0	Transcriptional regulator	SACOL2290	AraC family transcriptional regulator
SA0077	Ab free + Ca	L137S (TTA→TCA)	cobI →	Mg2+ transporter protein, CorA family protein			24.6	Magnesium and cobalt transport	SACOL2375	Magnesium and cobalt transport protein CorA, CorA family protein
SA0736	VAN	S144P (TCA→CCA)	nreB →	oxygen sensor histidine kinase nreB	0	7	0	TCS, nitrogen regulation	SACOL2390	General metabolism, Oxygen-sensing two-component system sensor histidine kinase NreB
ATCC29213	DAP	E45A (GAG→GCG)	sa29213_0_00385 →	hypothetical protein	0	6.6	0	Lipoprotein	SACOL2408	lipoprotein
ATCC29213	DAP	K56I (AAA→ATA)	sa29213_0_00385 →	hypothetical protein	0	5.8	0	Lipoprotein	SACOL2408	lipoprotein
SA0736	VAN	W315* (TGG→TAG)	flp ←	fmtA-like protein	0	0	7.5	Proteins of Unknown Function	SACOL2445	hypothetical protein
SA0077	VAN	Y156* (TAT→TAA)	gltB2 ←	glutamate synthase‑ferredoxin large subunit	0	10.6	0	Amino acid biosynthesis	SACOL2469	Biosynthesis of cofactors, prosthetic groups, and carriers
SA0077	VAN	P155Q (CCG→CAG)	gltB2 ←	glutamate synthase‑ferredoxin large subunit	0	17.1	0	Amino acid biosynthesis	SACOL2469	Biosynthesis of cofactors, prosthetic groups, and carriers
SA0077	VAN	P155T (CCG→ACG)	gltB2 ←	glutamate synthase‑ferredoxin large subunit	0	14.5	0	Amino acid biosynthesis	SACOL2469	Biosynthesis of cofactors, prosthetic groups, and carriers
SA0422	VAN	Y156* (TAT→TAA)	gltB2 ←	glutamate synthase‑ferredoxin large subunit	0	0	5.3	Amino acid biosynthesis	SACOL2469	Biosynthesis of cofactors, prosthetic groups, and carriers
SA0736	DAP	D154G (GAT→GGT)	gltB2 →	glutamate synthase‑ferredoxin large subunit	10.1	0	0	Amino acid biosynthesis	SACOL2469	Biosynthesis of cofactors, prosthetic groups, and carriers
SA0422	VAN	P155Q (CCG→CAG)	gltB2 ←	glutamate synthase‑ferredoxin large subunit	0	0	7.2	Amino acid biosynthesis	SACOL2469	Biosynthesis of cofactors, prosthetic groups, and carriers
SA0422	VAN	P155T (CCG→ACG)	gltB2 ←	glutamate synthase‑ferredoxin large subunit	0	0	10.9	Amino acid biosynthesis	SACOL2469	Biosynthesis of cofactors, prosthetic groups, and carriers
SA0422	VAN	I153V (ATT→GTT)	gltB2 ←	glutamate synthase‑ferredoxin large subunit	0	8.5	0	Amino acid biosynthesis	SACOL2469	Biosynthesis of cofactors, prosthetic groups, and carriers
SA0736	VAN	V149M (GTG→ATG)	gltB2 →	glutamate synthase‑ferredoxin large subunit	0	0	11.6	Amino acid biosynthesis	SACOL2469	Biosynthesis of cofactors, prosthetic groups, and carriers
SA0736	VAN	T151S (ACA→TCA)	gltB2 →	glutamate synthase‑ferredoxin large subunit	0	11.1	0	Amino acid biosynthesis	SACOL2469	Biosynthesis of cofactors, prosthetic groups, and carriers
SA0736	VAN	I153V (ATT→GTT)	gltB2 →	glutamate synthase‑ferredoxin large subunit	15.9	0	0	Amino acid biosynthesis	SACOL2469	Biosynthesis of cofactors, prosthetic groups, and carriers
SA0736	VAN	D154G (GAT→GGT)	gltB2 →	glutamate synthase‑ferredoxin large subunit	10.9	0	0	Amino acid biosynthesis	SACOL2469	Biosynthesis of cofactors, prosthetic groups, and carriers
SA0736	VAN	P155Q (CCG→CAG)	gltB2 →	glutamate synthase‑ferredoxin large subunit	0	0	7.1	Amino acid biosynthesis	SACOL2469	Biosynthesis of cofactors, prosthetic groups, and carriers
SA0085	VAN	I153V (ATT→GTT)	gltB2 ←	glutamate synthase‑ferredoxin large subunit	0	14.1	8.2	Amino acid biosynthesis	SACOL2469	Biosynthesis of cofactors, prosthetic groups, and carriers
SA0085	VAN	V149M (GTG→ATG)	gltB2 ←	glutamate synthase‑ferredoxin large subunit	0	0	8.2	Amino acid biosynthesis	SACOL2469	Biosynthesis of cofactors, prosthetic groups, and carriers
SA0077	DAP	P155Q (CCG→CAG)	gltB2 ←	glutamate synthase‑ferredoxin large subunit	0	12.2	0	Amino acid biosynthesis	SACOL2469	Biosynthesis of cofactors, prosthetic groups, and carriers
SA0077	DAP	D154E (GAT→GAA)	gltB2 ←	glutamate synthase‑ferredoxin large subunit	0	16.3	0	Amino acid biosynthesis	SACOL2469	Biosynthesis of cofactors, prosthetic groups, and carriers
SA0085	DAP	P155T (CCG→ACG)	gltB2 ←	glutamate synthase‑ferredoxin large subunit	0	17	0	Amino acid biosynthesis	SACOL2469	Biosynthesis of cofactors, prosthetic groups, and carriers
SA0736	DAP	D154E (GAT→GAA)	gltB2 →	glutamate synthase‑ferredoxin large subunit	0	17.3	0	Amino acid biosynthesis	SACOL2469	Biosynthesis of cofactors, prosthetic groups, and carriers
SA0736	DAP	Y156* (TAT→TAA)	gltB2 →	glutamate synthase‑ferredoxin large subunit	0	0	6.3	Amino acid biosynthesis	SACOL2469	Biosynthesis of cofactors, prosthetic groups, and carriers
SA0736	DAP_Y	Y156N (TAT→AAT)	gltB2 →	glutamate synthase‑ferredoxin large subunit			7.4	Amino acid biosynthesis	SACOL2469	Biosynthesis of cofactors, prosthetic groups, and carriers
ATCC29213	DAP	Q196K (CAA→AAA)	sa29213_0_00392 →	hypothetical protein	6.4	0	0	Proteins of Unknown Function	SACOL2477	hypothetical protein
ATCC29213	DAP	S211I (AGT→ATT)	sa29213_0_00392 →	hypothetical protein	5.6	0	0	Proteins of Unknown Function	SACOL2477	hypothetical protein
ATCC29213	VAN	Q196K (CAA→AAA)	sa29213_0_00392 →	hypothetical protein	8.3	0	0	Proteins of Unknown Function	SACOL2477	hypothetical protein
ATCC29213	VAN	A37S (GCA→TCA)	sa29213_0_00385 →	hypothetical protein	0	0	5.9	Proteins of Unknown Function	SACOL2487	hypothetical protein
SA0077	Ab free	I755V (ATT→GTT)	sa77_0_00211 ←	DEAD/H helicase / Type III restriction enzyme, res subunit			18.7	DNA Metabolism	SACOL2499	DNA metabolism, Putative DNA phosphorothioation system restriction enzyme
SA0077	Ab free + Ca	A450T (GCT→ACT)	copA ←	P‑ATPase superfamily P‑type ATPase copper (Cu2+) transporter			6.5	Copper transporter	SACOL2572	General metabolism, copper transporter
SA0077	Ab free	A450T (GCT→ACT)	copA ←	P‑ATPase superfamily P‑type ATPase copper (Cu2+) transporter			31.6	Copper transporter	SACOL2572	General metabolism, copper transporter
SA0077	DAP	I288L (ATT→CTT)	crtI →	phytoene desaturase	0	0	7.8	Staphyloxanthin biosynthesis	SACOL2578	crtQ, biosynthesis of staphyloxanthin
SA0077	DAP	L123V (TTA→GTA)	sa77_0_00500 →	glycosyl‑4,4'‑diaponeurosporenoate acyltransferase	0	0	8	Proteins of Unknown Function	SACOL2580	hypothetical protein
SA0077	Ab free + Ca	I97T (ATT→ACT)	sa77_0_00420 →	isochorismatase			8	Pyrimidine degradation	SACOL2667	Pyrimidine utilization protein B, isochorismatase family protein
SA0077	VAN	H402Y (CAT→TAT)	asp2 →	accessory secretory protein Asp2	100	100	100	Sec-mediated protein secretion	SACOL2673	accessory Sec system is a specialized transport system that exports serine-rich repeat (SRR) glycoproteins
SA0077	DAP	S230P (TCA→CCA)	cap1C →	capsular polysaccharide biosynthesis protein Cap1C	0	0	100	Capsular polysaccharide biosynthesis	SACOL2685 (Cap1C)	Capsular polysaccharide biosynthesis protein Cap1C
ATCC29213	DAP	P50L (CCA→CTA)	sa29213_0_00262 →	putative cell wall‑anchored protein	0	94.2	0	Surface protein	SAV2595	hypothetical protein, Predicted cell-wall-anchored protein SasK (LPXTG motif)
ATCC29213	VAN	S5T (TCA→ACA)	sdhB →	putative succinate dehydrogenase iron‑sulfur protein	5.9	0	0	TCA	sdhB	TCA cycle
ATCC29213	VAN	T80I (ACT→ATT)	srrA ←	winged helix family two component transcriptional regulator	0	100	100	TCS, respiratory response	srrA	Regulator, virulence regulator
SA0085	Ab free + Ca	K79E (AAA→GAA)	sucC ←	succinate‑‑CoA ligase (ADP‑forming) beta subunit			83.7	TCA	sucC	TCA cycle
SA0085	DAP	K79E (AAA→GAA)	sucC ←	succinate‑‑CoA ligase (ADP‑forming) beta subunit	13	0	0	TCA	sucC	TCA cycle
SA0085	VAN	K79E (AAA→GAA)	sucC ←	succinate‑‑CoA ligase (ADP‑forming) beta subunit	100	100	100	TCA	sucC	TCA cycle
ATCC29213	DAP	V127A (GTT→GCT)	typA →	small GTP‑binding protein domain:GTP‑binding protein TypA	0	100	100	Protein Metabolism	typA	Protein Metabolism
SA0422	DAP	D596E (GAT→GAA)	uvrB →	excision endonuclease subunit UvrB	11.2	0	0	DNA Metabolism	uvrB	DNA Metabolism
ATCC29213	DAP	V394A (GTA→GCA)	uvrB →	excision endonuclease subunit UvrB	0	13.1	0	DNA Metabolism	uvrB	DNA Metabolism
ATCC29213	VAN	E239K (GAA→AAA)	vraS →	integral membrane sensor signal transduction histidine kinase	0	38.2	0	CW Biosynthesis	vraS	CW regulator
SA0085	VAN	promoter (T→G), position -39	walR ← / ← purA	transcriptional regulator WalR/putative adenylosuccinate synthetase	0	0	100	CW Biosynthesis	yycF	CW regulator
SA0077	VAN	D83G (GAT→GGT)	walR ←	transcriptional regulator WalR	8.8	0	0	CW Biosynthesis	yycF	CW regulator
SA0085	VAN	T197I (ACA→ATA)	walR ←	transcriptional regulator WalR	48.5	0	0	CW Biosynthesis	yycF	CW regulator
SA0085	VAN	V186L (GTA→TTA)	walR ←	transcriptional regulator WalR	19.4	0	0	CW Biosynthesis	yycF	CW regulator
SA0077	VAN	Y505H (TAT→CAT)	walK ←	multi‑sensor signal transduction histidine kinase, WalK	0	100	100	CW Biosynthesis	yycG	CW regulator
SA0077	VAN	G223D (GGT→GAT)	walK ←	multi‑sensor signal transduction histidine kinase, WalK	8	0	0	CW Biosynthesis	yycG	CW regulator
SA0077	VAN	K13R (AAA→AGA)	walK ←	multi‑sensor signal transduction histidine kinase, WalK	8.6	0	0	CW Biosynthesis	yycG	CW regulator
SA0422	VAN	L429Q (CTG→CAG)	walK ←	multi‑sensor signal transduction histidine kinase, WalK	30.7	0	0	CW Biosynthesis	yycG	CW regulator
SA0736	VAN	G223D (GGT→GAT)	walK ←	multi‑sensor signal transduction histidine kinase, WalK	0	100	100	CW Biosynthesis	yycG	CW regulator
SA0422	DAP	R579L (CGT→CTT)	walK ←	multi‑sensor signal transduction histidine kinase, WalK	0	100	100	CW Biosynthesis	yycG	CW regulator
SA0422	VAN	L325* (TTA→TGA)	yycH ←	two‑component regulator YycH	12.8	0	0	CW Biosynthesis	yycH	CW regulator
SA0422	VAN	G76* (GGA→TGA)	yycH ←	two‑component regulator YycH	42.8	0	0	CW Biosynthesis	yycH	CW regulator
SA0422	VAN	Δ23 bp	yycH ←	two‑component regulator YycH	0	100	100	CW Biosynthesis	yycH	CW regulator
SA0736	VAN	R442K (AGG→AAG)	yycH ←	two‑component regulator YycH	5.8	0	0	CW Biosynthesis	yycH	CW regulator
ATCC29213	VAN	V13L (GTG→CTG)	yycI ←	regulatory protein YycI	0	100	100	CW Biosynthesis	yycI	CW regulator
SA0422	VAN	G92* (GGA→TGA)	yycI ←	regulatory protein YycI	6.9	0	0	CW Biosynthesis	yycI	CW regulator
